## **LINE-1 retrotransposon activation intrinsic to interneuron development**

Gabriela O. Bodea<sup>1,2,\*</sup>, Maria E. Ferreiro<sup>1</sup>, Francisco J. Sanchez-Luque<sup>3,4</sup>, Juan M. Botto<sup>1</sup>, Jay Rasmussen<sup>1</sup>, Muhammed A. Rahman<sup>1</sup>, Laura R. Fenlon<sup>1</sup>, Carolina Gubert<sup>5</sup>, Patricia Gerdes<sup>2</sup>, Liviu-Gabriel Bodea<sup>6</sup>, Prabha Ajjikuttira<sup>1</sup>, Peter Kozulin<sup>1</sup>, Victor Billon<sup>1,7</sup>, Santiago Morell<sup>2,†</sup>, Marie-Jeanne H.C. Kempen<sup>4</sup>, Chloe J. Love<sup>5</sup>, Lucy M. Palmer<sup>5</sup>, Adam D. Ewing<sup>2</sup>, Dhanisha J. Jhaveri<sup>1,2</sup>, Sandra R. Richardson<sup>2</sup>, Anthony J. Hannan<sup>5</sup>, Geoffrey J. Faulkner<sup>1,2,\*</sup>

<sup>1</sup>Queensland Brain Institute, University of Queensland, Brisbane QLD 4072, Australia.

<sup>2</sup>Mater Research Institute - University of Queensland, TRI Building, Woolloongabba QLD 4102, Australia.

<sup>3</sup>GENYO. Pfizer-University of Granada-Andalusian Government Centre for Genomics and Oncological Research, PTS Granada 18016, Spain.

<sup>4</sup>MRC Human Genetics Unit, Institute of Genetics and Cancer, University of Edinburgh, Western General Hospital, Edinburgh EH4 2XU, United Kingdom.

<sup>5</sup>Florey Institute of Neuroscience and Mental Health, University of Melbourne, Parkville VIC 3052, Australia.

<sup>6</sup>Clem Jones Centre for Ageing Dementia Research, Queensland Brain Institute, University of Queensland, Brisbane QLD 4072, Australia.

<sup>7</sup>Biology Department, École Normale Supérieure Paris-Saclay, 91190 Gif-sur-Yvette, France.

†Current address: Department of Genetics, University of Cambridge, Cambridge, CB2 3EH, United Kingdom.

\*Corresponding authors: [gabriela.bodea@gmail.com](mailto:gabriela.bodea@gmail.com) (G.O.B.); [faulknergj@gmail.com](mailto:faulknergj@gmail.com) (G.J.F)

1 **Transposable elements (TEs) are a reservoir of new transcription factor binding sites for**  
2 **protein-coding genes<sup>1-3</sup>. Developmental programs that activate TE-derived regulatory**  
3 **elements could, in principle, manifest in lineage-specific TE mobility. While somatic LINE-**  
4 **1 (L1) retrotransposon insertions have been detected in human neurons<sup>4-6</sup>, the impact of L1**  
5 **insertions on neurodevelopmental gene regulation, and whether L1 mobility is restricted to**  
6 **certain neuronal lineages, is unknown. Here, we reveal programmed L1 activation by**  
7 **SOX6, a transcription factor critical for parvalbumin (PV<sup>+</sup>) interneuron development<sup>7-9</sup>.**  
8 **PV<sup>+</sup> neurons harbor unmethylated and euchromatic L1 promoters, express L1 mRNA, and**  
9 **permit L1 transgene mobilization *in vivo*. Elevated L1 expression in adult dentate gyrus**  
10 **PV<sup>+</sup> neurons is however attenuated by environmental enrichment. Nanopore sequencing of**  
11 **PV<sup>+</sup> neurons identifies unmethylated L1 loci providing alternative promoters to core PV<sup>+</sup>**  
12 **neuron genes, such as CAPS2. These data depict SOX6-mediated L1 activation as an**  
13 **ingrained component of the mammalian PV<sup>+</sup> neuron developmental program.**

14 The retrotransposon L1 comprises ~18% of the human and mouse genomes, and remains  
15 a source of gene and regulatory sequence variation<sup>10-12</sup>. To mobilize, L1 initiates transcription of  
16 a full-length (>6kbp) mRNA from its internal 5'UTR promoter. The mRNA encodes two  
17 proteins, denoted ORF1p and ORF2p, that mediate L1 retrotransposition<sup>13-15</sup>. While the  
18 promoters of the youngest human (L1HS) and mouse (T<sub>F</sub>) L1 subfamilies differ in composition,  
19 they are each regulated by CpG methylation and contain binding sites for YY1 and SOX  
20 transcription factors<sup>6,16-23</sup> (**Fig. 1a**). SOX proteins bind two L1HS 5'UTR sites<sup>20</sup> previously  
21 linked to SOX2-mediated L1 transcriptional repression<sup>18</sup> (**Fig. 1b**), and SOX2 downregulation is  
22 thought to enable L1 retrotransposition in the neuronal lineage<sup>4-6,17,18,24,25</sup>. To functionally assess  
23 the L1HS 5'UTR SOX binding sites, we used a quantitative L1-EGFP retrotransposition reporter  
24 assay<sup>13,26,27</sup> in cultured PA-1 embryonal carcinoma cells. Inversion of either SOX site, or  
25 scrambling of the second site (+570 to +577), had no effect upon the mobility of L1.3, a highly  
26 mobile human L1<sup>28,29</sup> (**Fig. 1b**). Scrambling the first SOX site (+470 to +477) consistently  
27 reduced L1.3 retrotransposition efficiency by more than 40% (**Fig. 1b**). Of several SOX proteins  
28 known to be expressed in the brain<sup>8,30</sup>, including SOX2, SOX5, SOX6 and SOX11, the first SOX  
29 site most closely matched SOX6 (**Fig. 1b**), and this motif coincided with the center of an  
30 ENCODE SOX6 ChIP-seq peak (**Fig. 1a**) obtained from K562 human myelogenous leukemia  
31 cells<sup>31</sup>. Based on these *in vitro* data, we hypothesized SOX6 is an L1 activator.

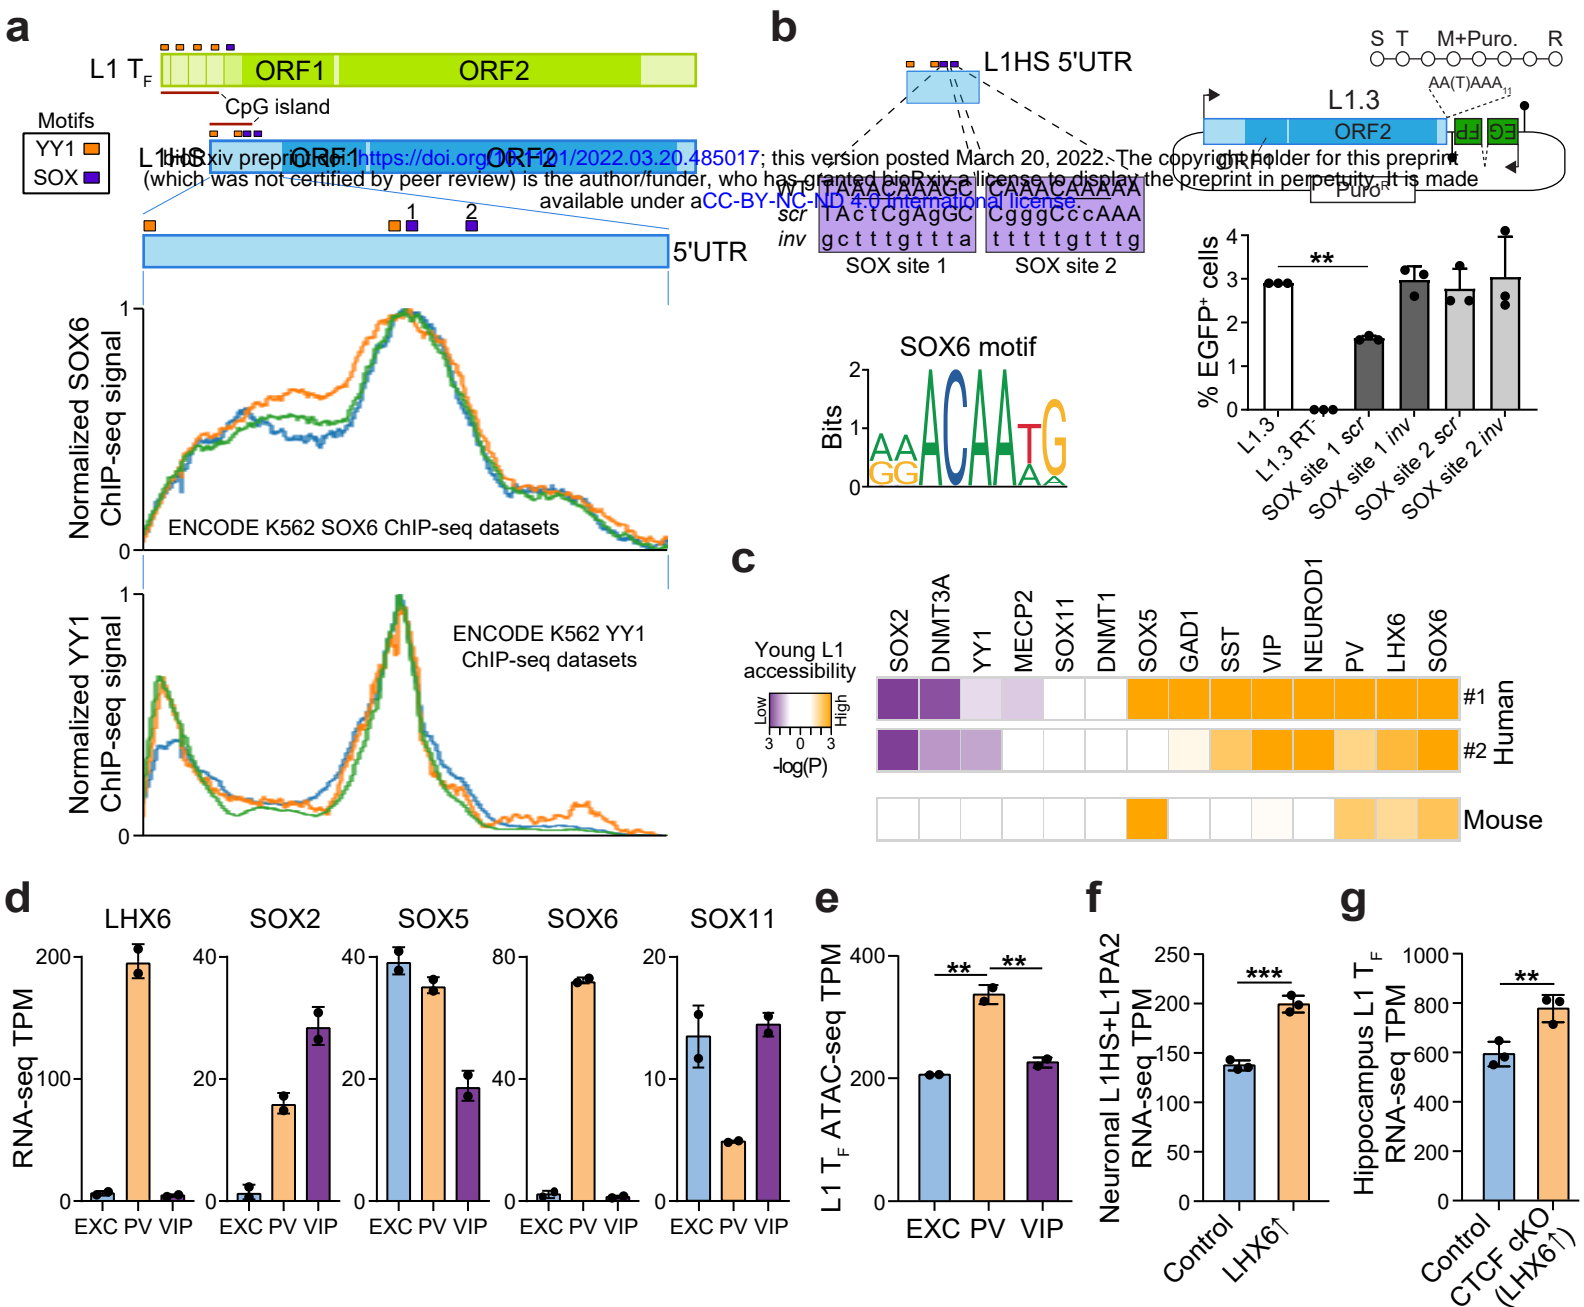

**Fig. 1: L1 activation by the LHX6/SOX6 transcriptional program.** **a**, Mouse (L1 T<sub>F</sub>) and human (L1HS) mobile L1s. Each cartoon indicates two ORFs, as well as 5'UTR embedded YY1- (orange) and SOX-binding (purple) sites, with the latter numbered 1 and 2 and corresponding to L1HS positions +470 to +477 and +570 to +577, respectively. Mouse L1 T<sub>F</sub> 5'UTR sequences are composed of multiple monomers, with 3.5 shown here, in addition to a non-monomeric sequence. Displayed underneath are MapR-RCon<sup>31</sup> profiles of ENCODE K562 SOX6 and YY1 ChIP-seq profiles of the L1HS 5'UTR. **b**, Left: annotated L1HS SOX-binding sites 1 and 2<sup>0</sup>, highlighted in bold, were scrambled (*scr*) or inverted (*inv*). Site 1 most closely matched the JASPAR<sup>91</sup> SOX6 binding site motif (matrix ID: MA0515.1). Right: L1 retrotransposition efficiency measured in cultured PA-1 cells using an enhanced green fluorescent protein (EGFP) L1 reporter assay<sup>13,26,27</sup>. The assay design (top) shows L1.3, a highly mobile L1HS element<sup>28,29</sup>, expressed from its native promoter (black arrow) and tagged with an EGFP cassette activated only upon retrotransposition and driven by a cytomegalovirus promoter (CMVp) (S, seeding; T, transfection; M, change of media; R, result analysis; filled lollipop, polyadenylation signal). AA(T)AAA indicates where a thymine base was removed to ablate the natural L1.3 polyadenylation signal. Cells are selected for puromycin resistance (Puro<sup>R</sup>) and retrotransposition efficiency is measured as the percentage of EGFP<sup>+</sup> sorted cells. Tested elements (bottom) included, in order, positive (L1.3) and negative (L1.3 RT<sup>-</sup>, D702A mutant) controls<sup>13,28</sup>, followed by L1.3 vectors where the SOX-binding sites were scrambled or inverted. **\*\****P*<0.01, *n*=3 replicates. **c**, L1 chromatin accessibility in hippocampal tissue as measured by human<sup>33</sup> and mouse<sup>32</sup> scATAC-seq. Cells were grouped based on selected accessible genes known to regulate L1 activity or define neuronal populations. In each group, the average number of reads aligned to a young L1 (mouse: L1 T<sub>F</sub>, human: L1HS or L1PA2) was calculated, with statistical significance compared to the remaining cells determined via permutation test (*n*=1000). Human data were available for two individuals (#1 and #2). **d**, LHX6, SOX2, SOX5, SOX6 and SOX11 expression in excitatory (EXC) pyramidal neuron, PV<sup>+</sup> interneuron and vasoactive intestinal peptide (VIP) interneuron cortex populations defined by Mo *et al.*<sup>35</sup>, measured by RNA-seq tags per million (TPM). **\*\*\****P*<0.001, *N*=2. **e**, Proportion of ATAC-seq reads aligned to peaks associated with full-length L1 T<sub>F</sub> copies in neuronal populations defined by Mo *et al.*<sup>35</sup>. **\*\****P*<0.01. **f**, Young human L1 subfamily expression measured by RNA-seq TPM in neurons derived via *in vitro* differentiation of induced pluripotent stem cells<sup>36</sup>, with (LHX<sup>↑</sup>) and without (control) LHX overexpression. **\*\*\****P*=0.0004, *N*=3. **g**, L1 T<sub>F</sub> subfamily expression measured by RNA-seq TPM in bulk hippocampus<sup>37</sup> of animals with (CTCF cKO) and without (control) conditional knockout of CTCF and associated induction of LHX6 expression. **\*\****P*=0.01, two-tailed t test, *N*=3. Note: histogram data in (b, d, e, f and g) are represented as mean ± SD. Significance testing for (b and e) was via one-way ANOVA with Tukey's multiple comparison test and for (f and g) via two-tailed t test.

32 SOX6 coordinates a major transcriptional program of the embryonic and adult brain,  
33 functioning downstream of LHX6 to ensure PV<sup>+</sup> neuron development<sup>7-9</sup>. To evaluate association  
34 of LHX6/SOX6 and L1 activity *in vivo*, we analyzed human and mouse hippocampus single-cell  
35 assay for transposase-accessible chromatin sequencing (scATAC-seq) datasets<sup>32,33</sup>. The  
36 known<sup>6,17,18,24,34</sup> L1 repressors SOX2, YY1 and DNMT3A were negatively correlated with  
37 human L1 accessibility (**Fig. 1c**). By contrast, LHX6, SOX6 and L1 accessibility were positively  
38 correlated in both species (**Fig. 1c**). We then examined mouse bulk excitatory and inhibitory  
39 neuron RNA-seq and ATAC-seq datasets<sup>35</sup> and found L1 accessibility, as well as LHX6 and  
40 SOX6 expression, were highest in PV<sup>+</sup> neurons, while SOX2, SOX5 and SOX11 expression  
41 were not specific to PV<sup>+</sup> neurons (**Fig. 1d,e**). Overexpression of LHX6 during human *in vitro*  
42 interneuron differentiation<sup>36</sup> (**Fig. 1f**) or via murine conditional *in vivo* knockout of the LHX6  
43 inhibitor CTCF<sup>37</sup> (**Fig. 1g**) significantly increased L1 transcript abundance. These analyses  
44 suggested SOX6 could activate L1 in the PV<sup>+</sup> neuron lineage.

45 As an orthogonal *in vivo* approach to examine L1 activity in PV<sup>+</sup> neurons, we generated a  
46 transgenic mouse line carrying an L1-EGFP retrotransposition reporter system (**Fig. 2a** and  
47 **Extended Data Fig. 1a**). Here, L1.3 incorporated T7 and 3×FLAG epitope tags on L1 ORF1p  
48 and ORF2p, respectively (**Fig. 2a**). Immunofluorescence revealed EGFP<sup>+</sup> neurons *in vivo* (**Fig.**  
49 **2b**). In agreement with prior transgenic L1 experiments<sup>18</sup>, nearly all EGFP<sup>+</sup> cells were found in  
50 the brain, apart from occasional EGFP<sup>+</sup> ovarian interstitial cells (**Extended Data Fig. 1b-e**).  
51 Tagged ORF1p and ORF2p expression was observed in EGFP<sup>+</sup> neurons, indicating the L1  
52 protein machinery coincided with retrotransposition (**Fig. 2c,d**). Crucially, 85.4% of EGFP<sup>+</sup>  
53 hippocampal cells were PV<sup>+</sup> neurons, on average (**Fig. 2e,f**). PV<sup>+</sup>/EGFP<sup>+</sup> neurons were found  
54 throughout the hippocampal dentate gyrus (DG) and cornu ammonis regions 1-3 (CA1-3,  
55 referred to here as CA) (**Fig. 2g**) but were infrequent in the cortex (**Fig. 2h**). EGFP<sup>+</sup> cells also  
56 expressed GAD1 (**Extended Data Fig. 1f**), another inhibitory interneuron marker<sup>38</sup>. Seeking a  
57 complementary method, we used *in utero* electroporation to deliver to the embryonic  
58 hippocampus a codon-optimized synthetic mouse L1 T<sub>F</sub> (L1SM)<sup>39</sup> bearing an EGFP reporter  
59 (**Extended Data Fig. 2a**). We observed occasional hippocampal EGFP<sup>+</sup>/PV<sup>+</sup> neurons in  
60 electroporated neonates (**Extended Data Fig. 2b**). No EGFP<sup>+</sup> cells were present when the  
61 reporter, with disabled L1 ORF2p endonuclease and reverse transcriptase activities<sup>39</sup>, was  
62 electroporated into the contralateral hemisphere (**Extended Data Fig. 2c**). As mouse and human

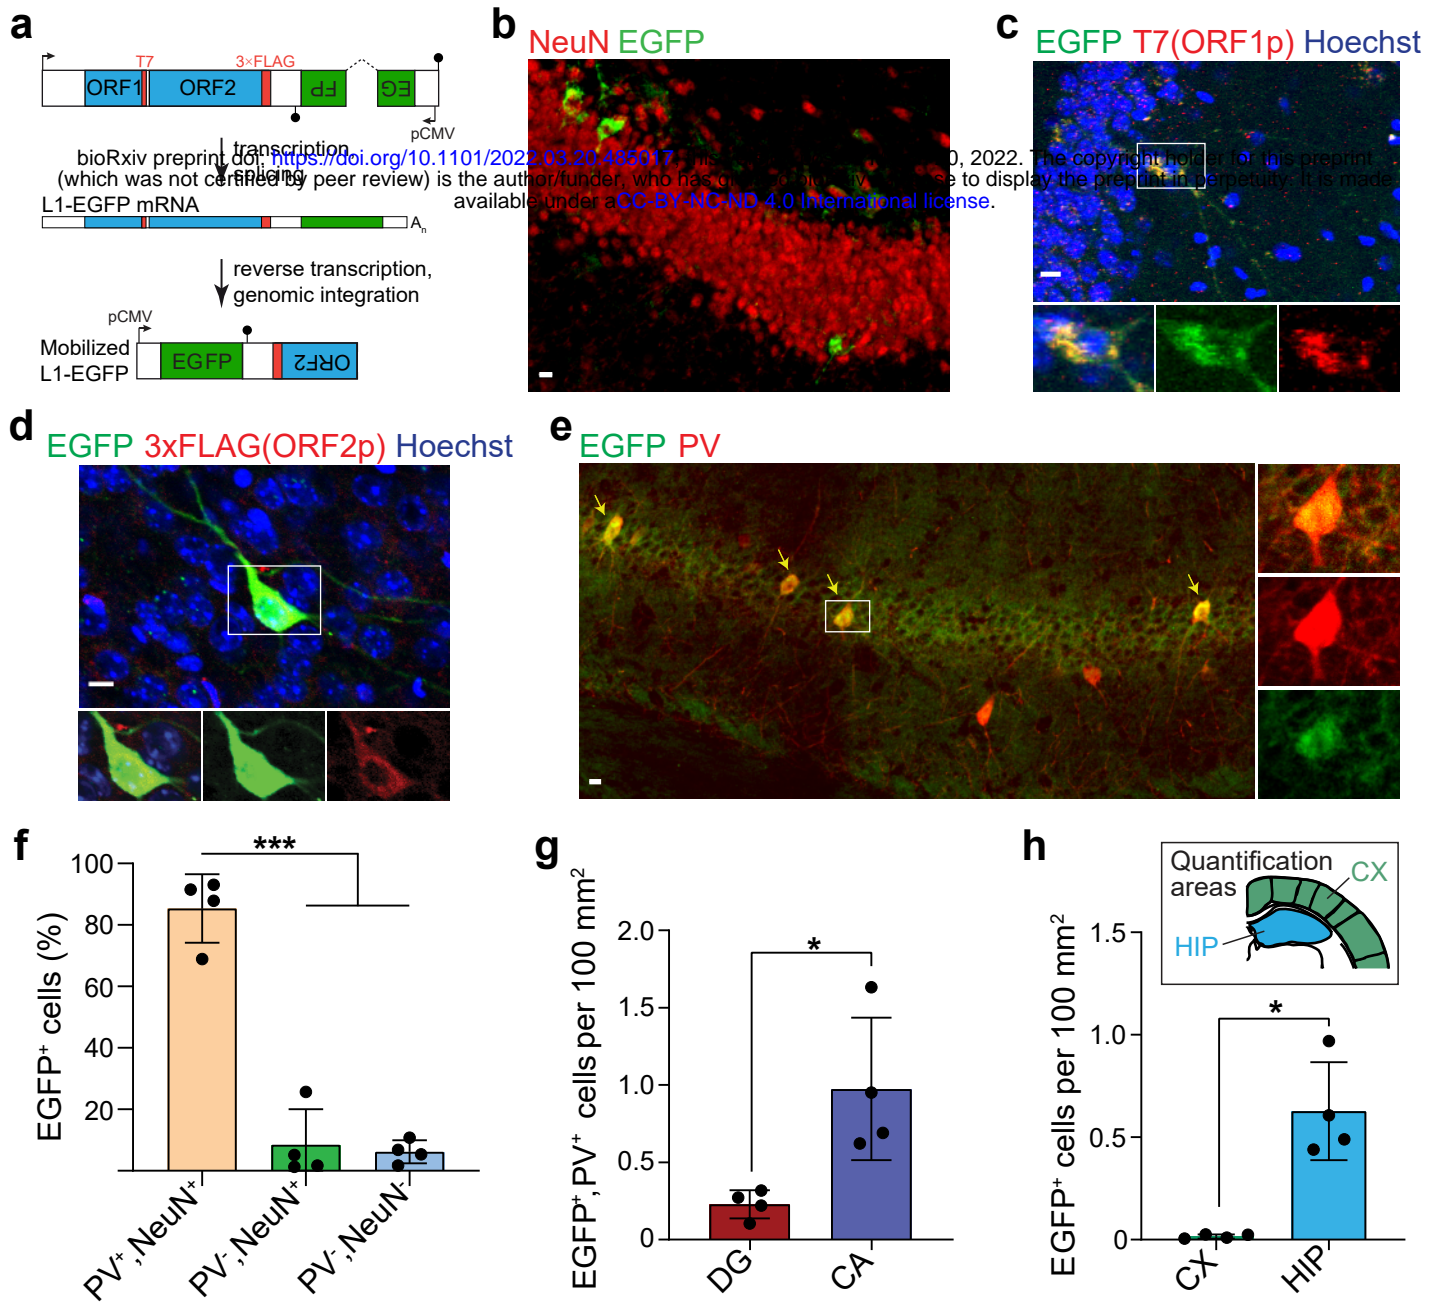

**Fig. 2: Engineered L1 retrotransposition in PV<sup>+</sup> neurons.** **a**, L1-EGFP reporter schematic. A retrotransposition-competent human L1<sup>26,28,29</sup> is expressed from its native promoter, harbors epitope tagged ORF1 (T7) and ORF2 (3×FLAG) sequences, and carries an EGFP indicator cassette. The EGFP is antisense to the L1, incorporates a  $\gamma$ -globin intron in the same orientation as the L1, expressed from a cytomegalovirus promoter (CMVp), and terminated by a polyadenylation signal (filled black lollipop). L1-EGFP transcription and mRNA splicing removes the  $\gamma$ -globin EGFP intron and, if this mRNA is retrotransposed, allows EGFP expression. **b**, Example EGFP<sup>+</sup> cells detected in the hippocampus. **c**, Representative confocal image of ORF1p immunostaining (T7 tag) of L1-EGFP adult mouse brain. Image insets show a selected cell in merged (top) and single channels for EGFP (green) and ORF1p (red). **d**, As for (c), except for 3×FLAG-tagged ORF2p. **e**, EGFP and PV immunostaining of an L1-EGFP animal coronal hippocampus section. Yellow arrows indicate EGFP<sup>+</sup> neurons. **f**, Percentages of hippocampal EGFP<sup>+</sup> cells colocalized with NeuN and PV. \*\*\* $P=0.0002$ , Welch's ANOVA,  $N(\text{mice})=4$ . **g**, Distribution of counted EGFP<sup>+</sup>/PV<sup>+</sup> cells in hippocampal substructures. \* $P=0.0453$ , two-tailed t test. **h**, EGFP<sup>+</sup> cell counts in cortex (CX) and hippocampus (HIP). \* $P=0.014$ , two-tailed t test. Note: panels (f-h) represent data as mean  $\pm$  SD. Scale bars in (b-e) indicate 100 $\mu\text{m}$ .

63 L1s delivered by distinct methods retrotransposed almost exclusively in PV<sup>+</sup> neurons *in vivo*, we  
64 inferred this lineage would likely satisfy the molecular prerequisites for endogenous L1 mobility.

65 To quantify single L1 mRNA molecules in neuronal subpopulations, we designed a  
66 custom RNA fluorescence *in situ* hybridization (FISH) probe against the monomeric 5'UTR of  
67 the mouse L1 T<sub>F</sub> subfamily<sup>40-42</sup> (**Extended Data Fig. 3**). With multiplexed RNA FISH, we  
68 measured cytoplasmic L1 and PV mRNA abundance in adult β-tubulin (Tub) immunostained  
69 neurons (**Fig. 3a** and **Extended Data Fig. 3**). L1 T<sub>F</sub> and PV expression were strongly correlated  
70 in DG (Spearman  $r=0.88$ ,  $P<0.001$ ) (**Fig. 3b**) and CA ( $r=0.82$ ,  $P<0.001$ ) (**Extended Data Fig.**  
71 **4a**) neurons. L1 T<sub>F</sub> transcription was significantly higher in PV<sup>+</sup> neurons, compared to PV<sup>-</sup>  
72 neurons, in DG ( $P=0.0016$ ) (**Fig. 3c**) and CA ( $P=0.0251$ ) (**Extended Data Fig. 4b**). A second L1  
73 T<sub>F</sub> 5'UTR RNA FISH probe (**Extended Data Fig. 3**) showed L1 mRNA enrichment in  
74 hippocampal and cortical PV<sup>+</sup> neurons (**Extended Data Fig. 4c-g**). We then used TaqMan qPCR  
75 to measure L1 expression in hippocampal PV<sup>+</sup> and PV<sup>-</sup> neurons sorted from pooled neonate  
76 littermates (**Extended Data Fig. 5**). Three qPCR primer/probe combinations (**Extended Data**  
77 **Fig. 3**) detecting the L1 T<sub>F</sub> 5'UTR each indicated significantly higher ( $P<0.03$ ) expression in  
78 PV<sup>+</sup> neurons (**Fig. 3d** and **Extended Data Fig. 6a,b**). By contrast, qPCR targeting the L1 T<sub>F</sub>  
79 ORF2 region, expected to mainly detect immobile 5' truncated L1s incorporated in other cellular  
80 mRNAs, showed no difference between PV<sup>+</sup> and PV<sup>-</sup> neurons (**Extended Data Fig. 6c,d**). We  
81 concluded PV<sup>+</sup> neurons were enriched for L1 T<sub>F</sub> mRNA.

82 Given environmental stimuli can evoke molecular phenotypes in circuits involving PV<sup>+</sup>  
83 neurons<sup>38</sup>, we analyzed L1 activity in adult mice housed in standard (STD) and enriched (ENR)  
84 environments. ENR cages were larger and incorporated ladders, tunneling objects, and toys of  
85 various textures, sizes and shapes (**Fig. 3e**). RNA FISH revealed a moderate (10.7%,  $P=0.049$ )  
86 reduction in DG PV<sup>+</sup> neuron L1 T<sub>F</sub> transcript abundance in the ENR group compared to the STD  
87 group (**Fig. 3f**) and a smaller, non-significant reduction (7.5%,  $P=0.189$ ) for CA PV<sup>+</sup> neurons  
88 (**Extended Data Fig. 7a**). No significant differences were seen for DG, CA or cortex PV<sup>-</sup>  
89 neurons or cortical PV<sup>+</sup> neurons (**Fig. 3g** and **Extended Data Fig. 7b-e**). Access to voluntary  
90 running wheel exercise in lieu of an enriched environment did not significantly alter L1 T<sub>F</sub>  
91 mRNA levels in DG PV<sup>+</sup> neurons (**Extended Data Fig. 7f**). Stereological analysis confirmed  
92 similar PV<sup>+</sup> neuron counts in ENR and STD animals (**Extended Data Fig. 7g,h**). Consistent,  
93 though non-significant, decreases in L1 T<sub>F</sub> 5'UTR mRNA abundance were observed by qPCR in

**a** Tub DAPI PV probe L1 T<sub>F</sub> probe A

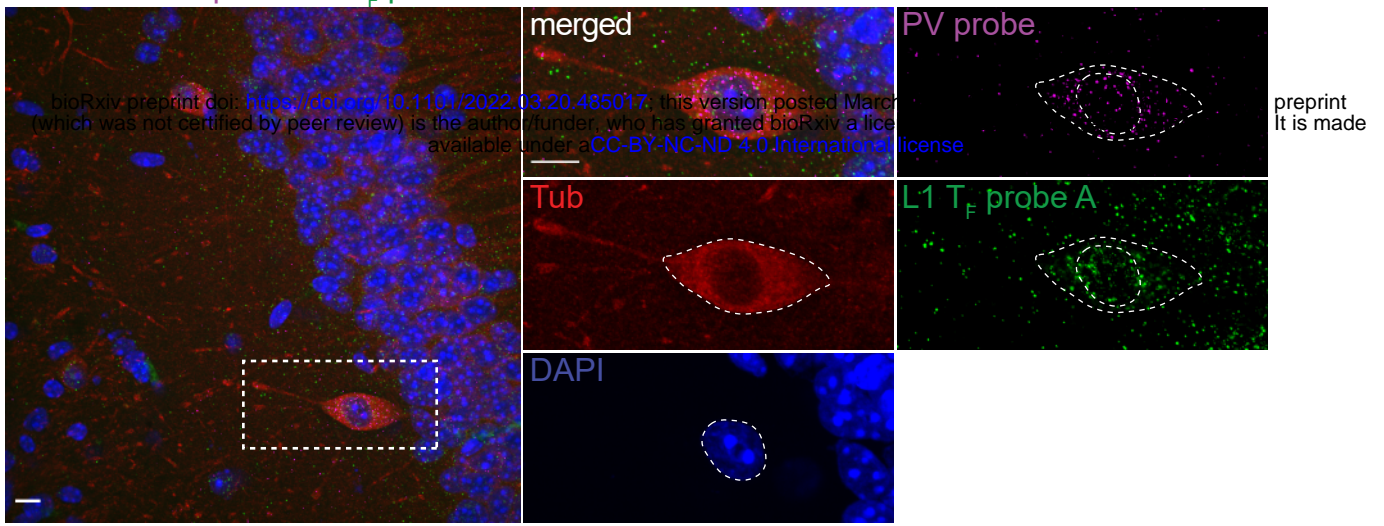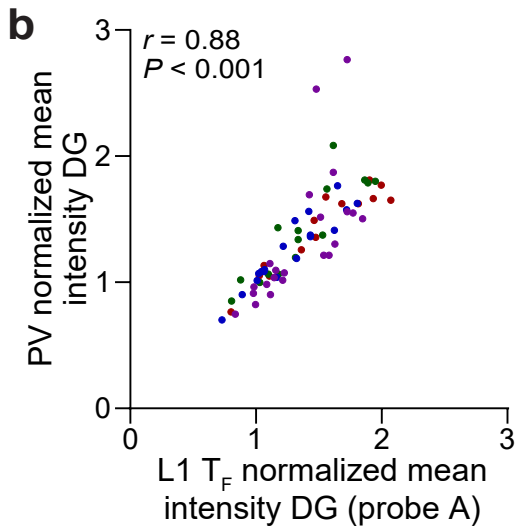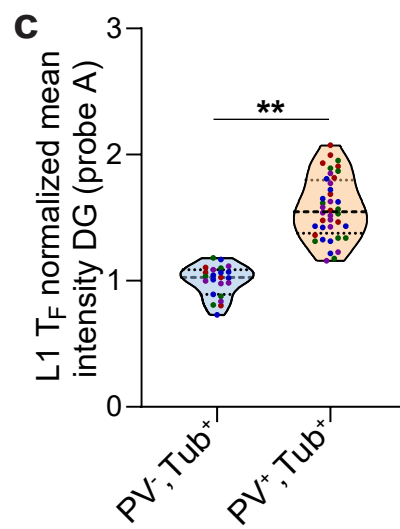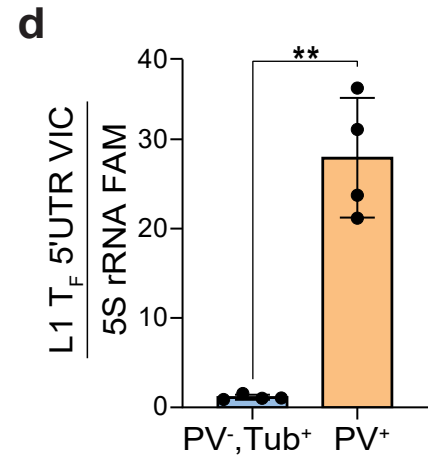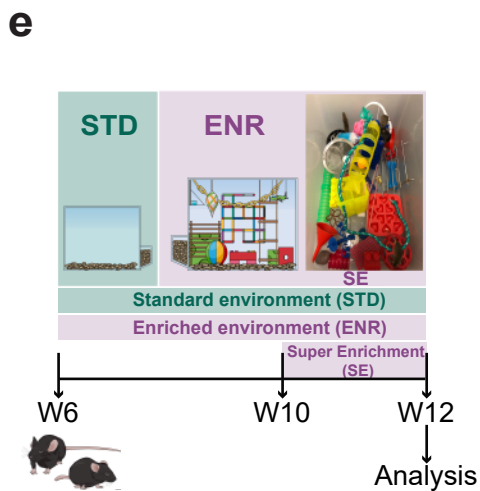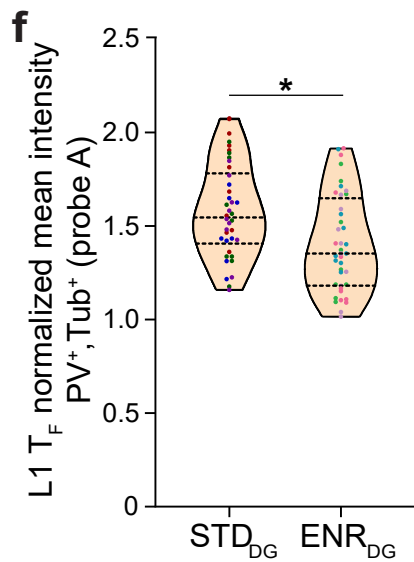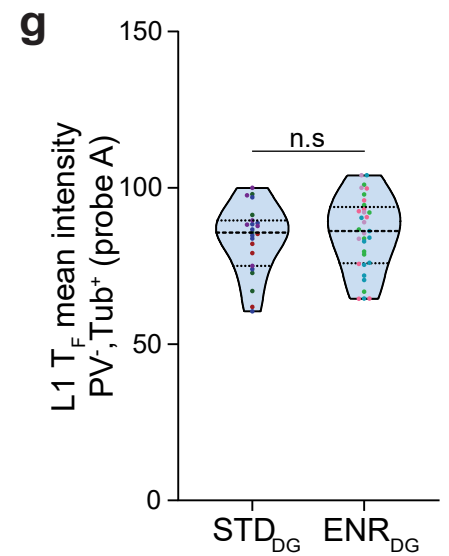

**Fig. 3: L1 mRNA is abundant in PV<sup>+</sup> neurons.** **a**, Representative maximum intensity projection confocal image of a coronal hippocampus section showing L1 T<sub>F</sub> (green) and PV (magenta) transcripts detected by RNA FISH,  $\beta$ -tubulin (Tub, red) immunohistochemistry and DAPI staining (blue). Image insets show higher magnification of a selected PV<sup>+</sup> neuron (dashed rectangle). Dashed lines in image insets demark nuclear and cellular boundaries defined for PV and L1 mRNA quantification. Scale bar: 10 $\mu$ m. **b**, Mean PV RNA FISH intensity in dentate gyrus (DG) Tub<sup>+</sup> neurons, as a function of L1 T<sub>F</sub> (probe A) signal. Spearman  $r=0.88$ ,  $P<0.001$  at  $\alpha=0.05$ ,  $n(\text{cells})=69$ ,  $N(\text{mice})=4$ . Cells from different mice are color coded. **c**, Mean L1 T<sub>F</sub> RNA FISH intensity in DG PV<sup>-</sup>/Tub<sup>+</sup> and PV<sup>+</sup>/Tub<sup>+</sup> neurons.  $**P=0.0016$ , PV<sup>-</sup>/Tub<sup>+</sup>  $n=23$ , PV<sup>+</sup>/Tub<sup>+</sup>  $n=40$ ,  $N=4$ . **d**, Multiplexed TaqMan qPCR<sup>34</sup> measuring mRNA abundance of the L1 T<sub>F</sub> monomeric 5'UTR (VIC channel) relative to 5S rRNA (FAM channel) in PV<sup>-</sup>/Tub<sup>+</sup> and PV<sup>+</sup> neurons. Cells were sorted from pooled neonate (P0) litter hippocampi.  $**P=0.004$ ,  $N=4$  litters. Data are represented as mean  $\pm$  SD. **e**, Standard (STD) and enriched (ENR) environment housing schematics. Mice (aged 6 weeks) were placed in either STD or ENR housing for 6 weeks. ENR consisted of: large cage for spatial stimuli; ladders, tunneling objects and toys of various textures, sizes, and shapes for sensory, cognitive and motor stimulation. Between week 10 and 12, ENR mice were exposed three times a week for one hour to 'super-enriched' condition in a larger playground arena with novel toys. **f**, Mean L1 T<sub>F</sub> RNA FISH intensity in PV<sup>+</sup>/Tub<sup>+</sup> neurons from STD and ENR animal DG tissue.  $*P=0.049$ , STD  $n=38$ , ENR  $n=40$ ,  $N=4$ . **g**, As for (f), except comparing DG PV<sup>-</sup>/Tub<sup>+</sup> neurons.  $P=0.444$ , STD  $n=23$ , ENR  $n=33$ . Note: PV<sup>+</sup> values in (c, d, f) were normalized to PV<sup>-</sup>/Tub<sup>+</sup> mean values. Significance testing was via two-tailed t test, comparing animal or litter mean values.

94 ENR bulk hippocampus, compared to STD samples, while ORF2 was not lower (**Extended Data**  
95 **Fig. 7i-k**). Considered alongside these results, our RNA FISH data suggested adult DG PV<sup>+</sup>  
96 neuron L1 transcription was specifically attenuated *in vivo* by environmental enrichment.

97 DNA methylation mediates L1 promoter silencing<sup>6,22,23</sup>. Therefore, to explain the  
98 apparent specificity of L1 transcription to PV<sup>+</sup> neurons, we performed L1 T<sub>F</sub> 5'UTR monomer  
99 bisulfite sequencing<sup>43</sup> on neonate hippocampal cell populations. L1 T<sub>F</sub> was significantly  
100 ( $P=0.03$ ) less methylated on average in PV<sup>+</sup> neurons (83.9%) than in PV<sup>-</sup> neurons (91.8%) (**Fig.**  
101 **4a,b**). Unmethylated L1 T<sub>F</sub> monomers were only observed in PV<sup>+</sup> neurons (**Fig. 4a,c**). DNMT1,  
102 DNMT3A and MeCP2 effect methylation-associated transcriptional repression in PV<sup>+</sup> neurons<sup>44-</sup>  
103 <sup>47</sup>. These genes all expressed significantly ( $P<0.05$ ) less mRNA in neonate PV<sup>+</sup> neurons than in  
104 PV<sup>-</sup> neurons (**Fig. 4d,e** and **Extended Data Fig. 8a**). MeCP2 protein expression was on average  
105 10.5% lower in adult PV<sup>+</sup> neurons, compared to PV<sup>-</sup> neurons ( $P=0.0007$ ) (**Extended Data Fig.**  
106 **8b,c**). L1 repression thus appeared broadly relaxed in PV<sup>+</sup> neurons.

107 Long-read Oxford Nanopore Technologies (ONT) sequencing allows genome-wide  
108 analysis of TE family methylation, as well as that of individual TE loci<sup>48</sup>. We therefore ONT  
109 sequenced PV<sup>+</sup> and PV<sup>-</sup> cells from pooled neonate hippocampus samples to ~25× and ~15×  
110 combined genome-wide depths, respectively. Amongst the potentially mobile TE families  
111 surveyed, only the youngest mouse L1s (T<sub>F</sub>, G<sub>F</sub> and A-type) were significantly ( $P<0.05$ ) less  
112 methylated in PV<sup>+</sup> cells than in PV<sup>-</sup> cells (**Fig. 4f**). L1 loci supplied the vast majority (82%) of  
113 differentially methylated TEs (**Fig. 5a**). Of 545 differentially methylated ( $P<0.01$ ) full-length L1  
114 T<sub>F</sub> loci, 543 were less methylated in PV<sup>+</sup> cells (**Supplementary Table 1**). Notably, the T<sub>F</sub>  
115 subfamily can be further divided into three additional groups distinguishable by ONT  
116 sequencing, denoted T<sub>FI</sub>, T<sub>FII</sub>, and T<sub>FIII</sub>, where T<sub>FIII</sub> is the oldest and diverges in its 5'UTR when  
117 compared to T<sub>FII</sub><sup>49</sup>. We found by far the highest fraction (72%) of strongly demethylated L1s  
118 corresponded to the T<sub>FIII</sub> subfamily (**Fig. 5b,c**). We noted the non-monomeric T<sub>FIII</sub> 5'UTR  
119 contained two predicted SOX protein binding sites, whereas other young mouse L1 5'UTRs  
120 contained only one of these motifs (**Fig. 5d**). Remarkably, significantly hypomethylated L1 T<sub>FIII</sub>  
121 copies with intact ORFs were observed in the introns of protein-coding genes critical to PV<sup>+</sup>  
122 neuron development and function, such as CAPS2<sup>50,51</sup>, CHL1<sup>52</sup>, and ERBB4<sup>53</sup> (**Fig. 5e,f** and  
123 **Extended Data Fig. 9** and **Supplementary Table 1**). In CAPS2, for example, the L1 5'UTR  
124 was completely unmethylated in numerous PV<sup>+</sup> neurons (**Fig. 5f**). Analysis of ENCODE PacBio



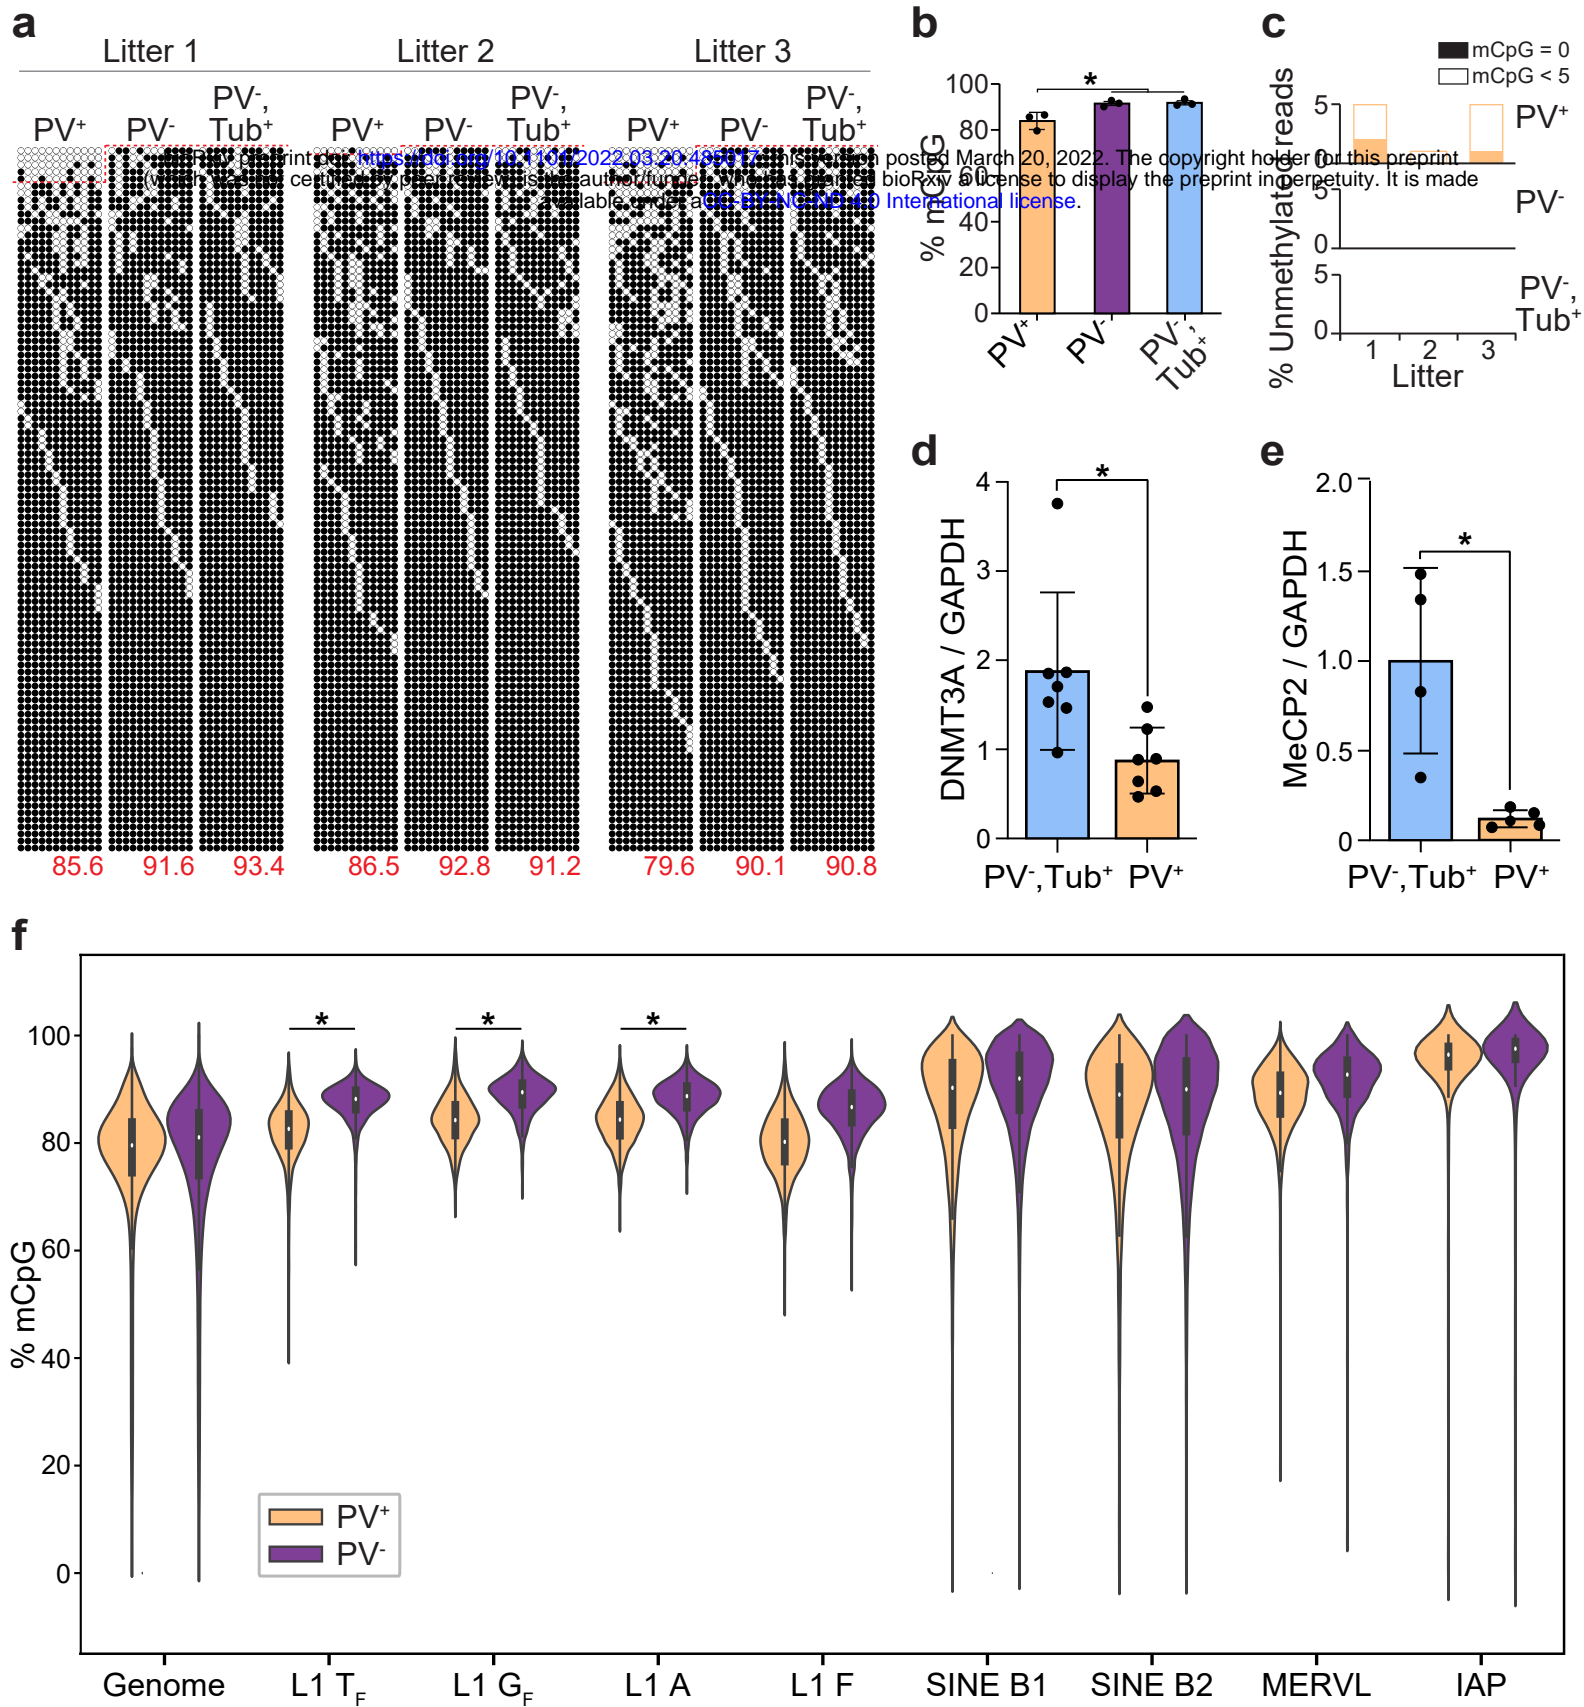

**Fig. 4: Global L1 T<sub>F</sub> promoter hypomethylation in PV<sup>+</sup> neurons.** **a**, Targeted bisulfite sequencing of L1 T<sub>F</sub> promoter monomer CpG islands<sup>43</sup> was performed on PV<sup>+</sup>, PV<sup>-</sup> and PV<sup>-</sup>/Tub<sup>+</sup> cells sorted from pooled hippocampal tissue from each of three neonate (P0) litters. Each cartoon displays 100 non-identical randomly selected sequences, where methylated CpGs (mCpGs) and unmethylated CpGs are represented by black and white circles, respectively, as well as the overall mCpG percentage (red numbers). Amplicons above the dotted red line contain <5 mCpGs. **b**, L1 T<sub>F</sub> monomer methylation was significantly lower ( $*P < 0.05$ , two-tailed t test) in PV<sup>+</sup> neurons than in either PV<sup>-</sup> or PV<sup>-</sup>/Tub<sup>+</sup> cells. **c**, Fully (mCpG=0) and nearly (mCpG<5) unmethylated L1 T<sub>F</sub> monomers were only found in PV<sup>+</sup> neurons. **d**, DNMT3A mRNA abundance measured by qPCR in PV<sup>-</sup>/Tub<sup>+</sup> and PV<sup>+</sup> neurons, relative to GAPDH.  $*P = 0.024$ , two-tailed t test,  $N = 7$  litters. **e**, As for (d), except for MeCP2.  $*P = 0.041$ ,  $N = 4$ . **f**, CpG methylation ascertained by barcoded ONT sequencing upon matched hippocampal PV<sup>+</sup> and PV<sup>-</sup> cells from ten separate neonate litter pools. Results are shown for the whole genome (10kbp windows), T<sub>F</sub>, G<sub>F</sub>, A-type and F-type L1s >6kbp, B1 (>140bp) and B2 (>185bp) SINEs, and MERVL MT2 (>470bp) and IAP (>320bp) long terminal repeats. Included elements accrued at least 20 methylation calls and 4 reads in each of the combined PV<sup>+</sup> and PV<sup>-</sup> datasets.  $*P < 0.05$ , Friedman test followed by Dunn's multiple comparison test,  $N = 10$  litter means. Note: histogram data are represented as mean  $\pm$  SD.

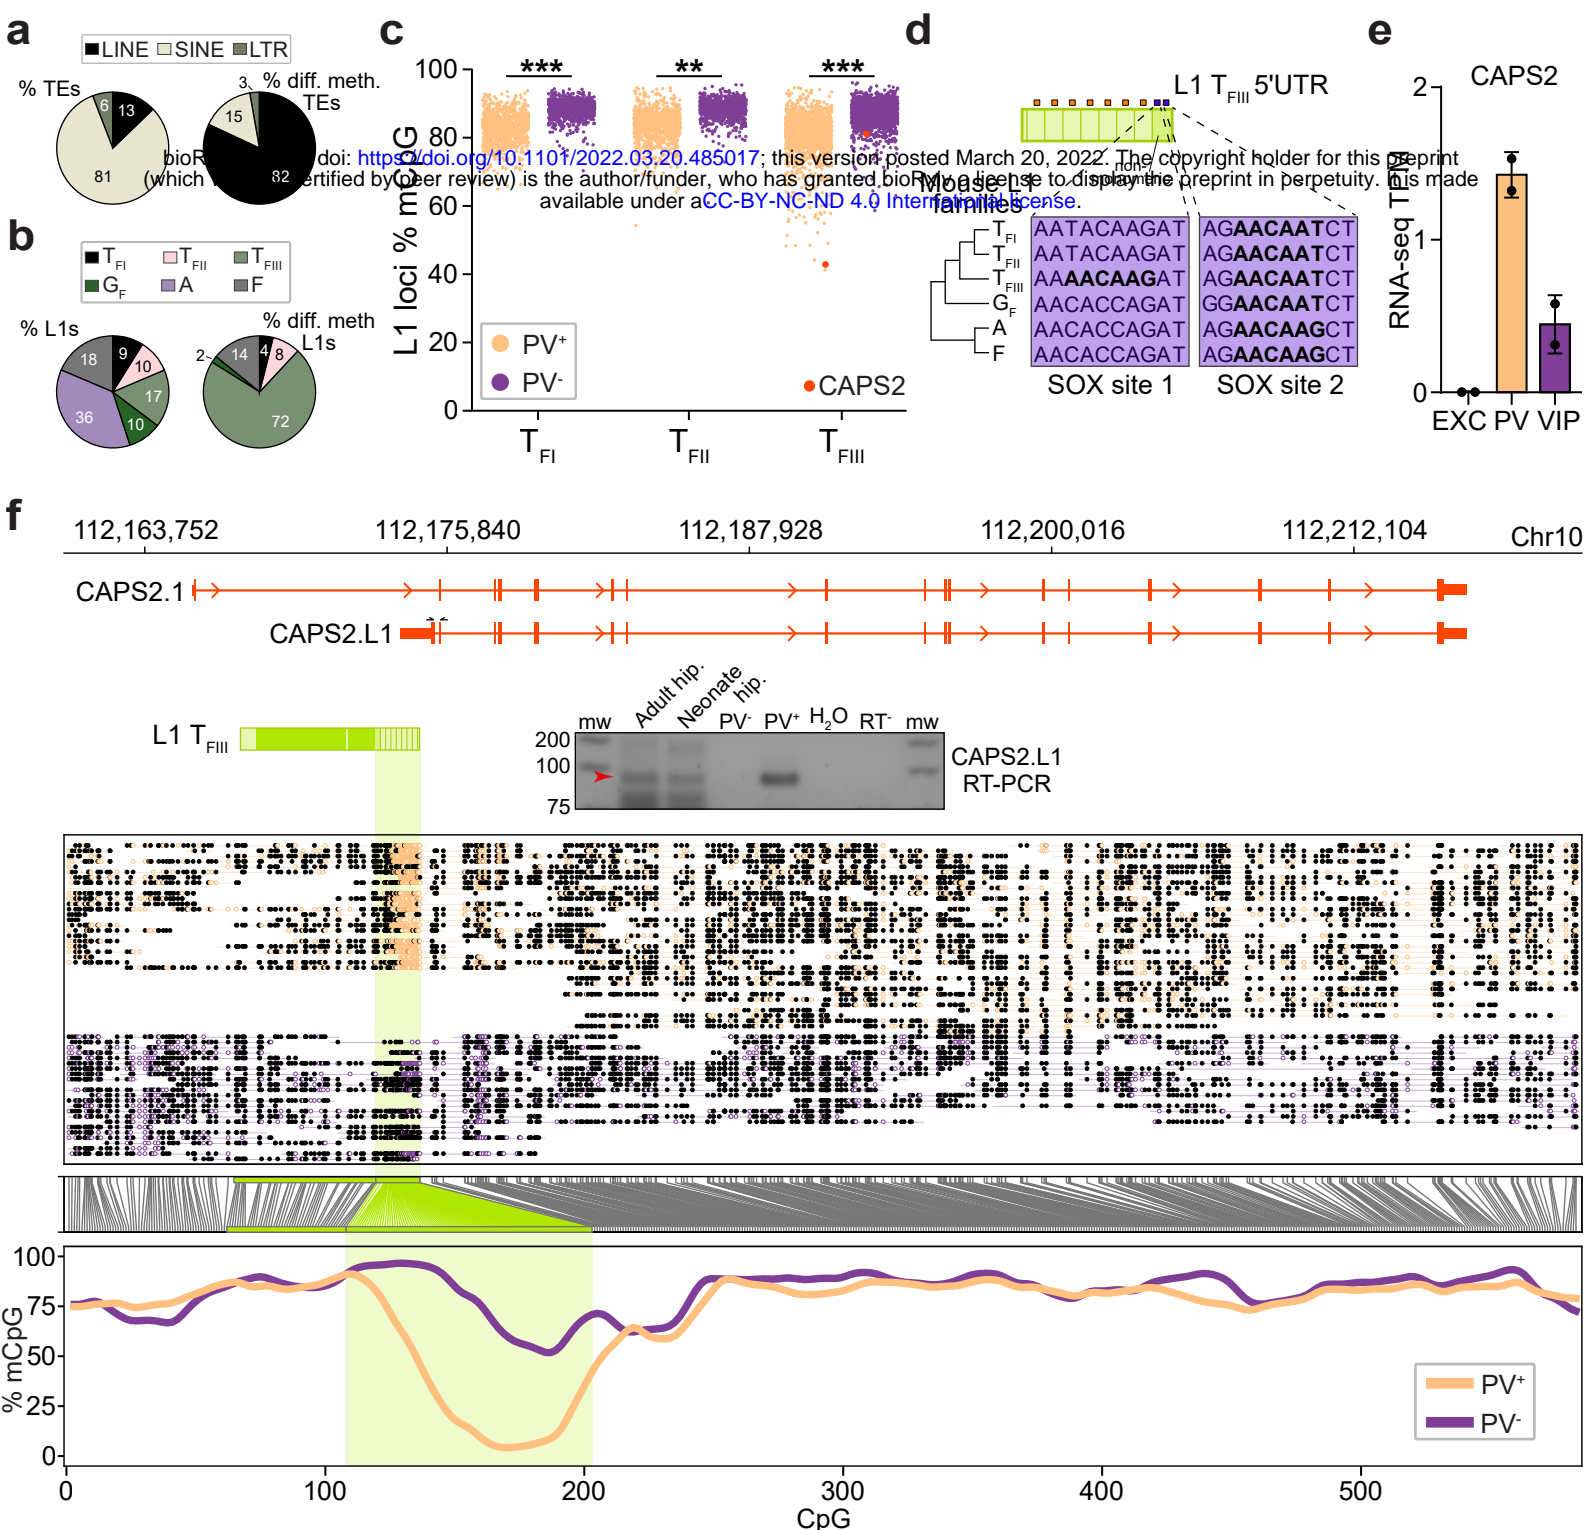

**Fig. 5: PV<sup>+</sup> neuron genes harbor hypomethylated L1 T<sub>F</sub> promoters.** **a**, Composition of all young (left) and differentially methylated ( $P < 0.01$ , Supplementary Table 1) young (right) TEs, by superfamily. Note: MERVL and IAP are LTR retrotransposons. **b**, As per (a), except showing the breakdown of young L1 subfamilies (left) and their contribution to the 50 differentially methylated ( $P < 0.01$ ) loci showing the largest absolute change in methylation percentage. **c**, L1 T<sub>FI</sub>, T<sub>FII</sub> and T<sub>FIII</sub> subfamily CpG methylation strip plots for PV<sup>+</sup> and PV<sup>-</sup> cells, as represented collectively by the L1 T<sub>F</sub> violin plot in Fig. 4f. Each point represents an L1 locus, with an example intronic to CAPS2 highlighted by an orange dot.  $**P < 0.01$  and  $***P < 0.001$ , Friedman test followed by Dunn's multiple comparison test,  $N = 10$  litter means. **d**, The mouse L1 T<sub>FIII</sub> subfamily 5'UTR is composed of multiple monomers, with 7.5 shown here, in addition to a non-monomeric sequence. YY1- (orange) and SOX-binding (purple) sites are shown. The L1 T<sub>FIII</sub> consensus non-monomeric region contains two predicted SOX-binding sites, highlighted in bold, whereas the other young L1s have only one. The depicted cladogram is based on a multiple sequence alignment of non-monomeric sequences. **e**, CAPS2 expression in excitatory (EXC) pyramidal neuron, PV<sup>+</sup> interneuron and vasoactive intestinal peptide (VIP) interneuron cortex populations defined by Mo *et al.*<sup>35</sup>, measured by RNA-seq tags per million (TPM).  $N = 2$ . **f**, Methylation profile of the CAPS2 locus obtained from ONT sequencing. The first panel shows a full-length L1 T<sub>FIII</sub> with intact ORFs, as highlighted in (c), orientated antisense to the first intron of the canonical CAPS2.1 isoform. ENCODE long-read transcriptome sequencing of hippocampus tissue (ENCLB505CBY) indicated a chimeric transcript, labeled here CAPS2.L1, spliced into CAPS2.1 and encoding an ORF in frame with the CAPS2.1 ORF. The gel image displays PCR products generated using primers specific to CAPS2.L1 (marked by opposing black arrows), with input template cDNA from bulk adult hippocampus (5'RACE) and neonate hippocampus (reverse transcribed total RNA from bulk and sorted PV<sup>+</sup> and PV<sup>-</sup> cells). A red arrow indicates on-target products confirmed by capillary sequencing. The second panel displays aligned ONT reads, with unmethylated CpGs colored in orange (PV<sup>+</sup>) and purple (PV<sup>-</sup>), and methylated CpGs colored black. The third panel indicates the relationship between CpG positions in genome space and CpG space, including those corresponding to the L1 T<sub>FIII</sub> 5'UTR (shaded light green). The fourth panel indicates the fraction of methylated CpGs for each cell type across CpG space.

125 long-read hippocampus transcriptome sequencing<sup>54</sup> indicated the L1 5'UTR initiated an antisense  
126 novel transcript, which we termed CAPS2.L1, spliced into downstream CAPS2 exons and in  
127 frame with the canonical CAPS2 ORF (**Fig. 5f**). By 5'RACE and RT-PCR, we reliably detected  
128 CAPS2.L1 in adult and neonate hippocampus tissue, and in PV<sup>+</sup> cells, but not PV<sup>-</sup> cells (**Fig. 5f**).  
129 Aside from the CAPS2 example, we identified 43 young mouse L1s whose 5'UTR promoted  
130 expression of a spliced transcript annotated by GenBank or detected by the abovementioned  
131 ENCODE PacBio datasets (**Supplementary Table 1**). These results suggested unmethylated L1s  
132 can provide alternative promoters otherwise repressed during neurogenesis<sup>12,55,56</sup> to key genes  
133 required for proper mouse PV<sup>+</sup> neuron development and function.

134 In sum, this study reveals L1 activity in the PV<sup>+</sup> neuron lineage governed by SOX6  
135 (**Extended Data Fig. 10**). PV<sup>+</sup> neurons are “node” cells that connect neural circuits associated  
136 with memory consolidation and other core cognitive processes<sup>57,58</sup>. The potential for  
137 neurodevelopmental L1 mobility as a consequence of PV<sup>+</sup> neuron genes incorporating  
138 unmethylated retrotransposition-competent L1s is notable given the proposed roles for stochastic  
139 L1-mediated genome mosaicism in the brain<sup>18,59-61</sup>. Our results do not however preclude other  
140 neuronal subtypes or brain regions from expressing L1 mRNA. Engineered L1 reporter  
141 experiments have thus far generated data congruent with endogenous L1 mobility in the early  
142 embryo<sup>42,62</sup>, neurons<sup>4-6,18,24,63</sup> and in cancer<sup>13,16,64</sup>. While we and others have mapped endogenous  
143 L1 retrotransposition events in individual human neurons<sup>4-6</sup>, the composition of the L1 T<sub>F</sub> 3'UTR  
144 appears to severely impede such analyses in mouse<sup>42,43,65</sup>. Prior pan-neuronal studies reported  
145 elevated L1-EGFP mobility associated with exercise-induced adult neurogenesis<sup>66</sup> and, as a  
146 result of early-life stress, increased L1 DNA copy number<sup>34</sup>. That elevated PV<sup>+</sup> neuron L1  
147 activity in adult DG was here moderately attenuated, rather than increased, by ENR housing, and  
148 not affected by voluntary exercise, was therefore unexpected. Environmental enrichment may  
149 counter physiological stress upon PV<sup>+</sup> neurons<sup>67-69</sup>, and could enhance L1 repression<sup>70</sup>. As  
150 shown in other biological contexts<sup>1,3,10,21</sup>, L1 activation in PV<sup>+</sup> neurons illustrates how  
151 retrotransposons may be incorporated into transcription factor programs guiding cell fate and  
152 mature function, potentially in an experience-dependent manner.

153

## 154 **Acknowledgements**

155 We thank J.D. Boeke, J.L. Garcia-Perez and J.V. Moran for sharing L1SM and L1.3 plasmids,

156 and P. Sah, R. Lister, R. Sullivan, S. van de Wakker, A. Gaudin, S.W. Cheetham, N. Jansz and  
157 members of the Faulkner laboratory for helpful discussions. We acknowledge the QBI and TRI  
158 Flow Cytometry suites for technical advice and the QBI Advanced Microscopy Facility for  
159 technical assistance and equipment, supported by ARC LIEF grant LE130100078. This work  
160 was supported by NHMRC-ARC Dementia Research Development Fellowship GNT1108258  
161 and DFG fellowship BO4460/1-1 (G.O.B.), NHMRC Investigator Grants GNT1173476 (S.R.R.)  
162 and GNT1173711 (G.J.F.), ARC Discovery Project DP200102919 (S.R.R. and G.J.F.), NHMRC  
163 Project Grants GNT1106206 (G.J.F., A.J.H., L.M.P.) and GNT1126393 (G.J.F.), a CSL  
164 Centenary Fellowship (G.J.F), and the Mater Foundation.

165

### 166 **Author contributions**

167 G.O.B. and G.J.F. designed the project and wrote the manuscript. G.O.B., M.E.F., F.J.S-L.,  
168 J.M.B., J.R., M.A.R., L.R.F., C.G., P.G., L-G.B, P.A., V.B., S.M., M-J.H.C.K. and C.J.L.  
169 performed experiments. G.O.B., M.E.F., P.K., A.D.E., D.J.J., S.R.R., A.J.H. and G.J.F. analyzed  
170 the data. G.O.B., L.M.P., S.R.R., A.J.H. and G.J.F. provided resources.

171

### 172 **Competing interests**

173 The authors declare no competing interests.

174

### 175 **References**

- 176 1. Chuong, E. B., Elde, N. C. & Feschotte, C. Regulatory activities of transposable elements:  
177 from conflicts to benefits. *Nat. Rev. Genet.* **18**, 71–86 (2017).
- 178 2. Britten, R. J. & Davidson, E. H. Gene regulation for higher cells: a theory. *Science* **165**,  
179 349–357 (1969).
- 180 3. Senft, A. D. & Macfarlan, T. S. Transposable elements shape the evolution of mammalian  
181 development. *Nat. Rev. Genet.* **22**, 691–711 (2021).
- 182 4. Erwin, J. A. *et al.* L1-associated genomic regions are deleted in somatic cells of the healthy  
183 human brain. *Nat. Neurosci.* **19**, 1583–1591 (2016).
- 184 5. Evrony, G. D. *et al.* Cell lineage analysis in human brain using endogenous retroelements.  
185 *Neuron* **85**, 49–59 (2015).
- 186 6. Sanchez-Luque, F. J. *et al.* LINE-1 Evasion of Epigenetic Repression in Humans. *Mol. Cell*

- 187           **75**, 590–604 (2019).
- 188    7.    Batista-Brito, R. *et al.* The cell-intrinsic requirement of Sox6 for cortical interneuron  
189           development. *Neuron* **63**, 466–481 (2009).
- 190    8.    Connor, F., Wright, E., Denny, P., Koopman, P. & Ashworth, A. The Sry-related HMG  
191           box-containing gene Sox6 is expressed in the adult testis and developing nervous system of  
192           the mouse. *Nucleic Acids Res.* **23**, 3365–3372 (1995).
- 193    9.    Munguba, H. *et al.* Postnatal Sox6 regulates synaptic function of cortical parvalbumin-  
194           expressing neurons. *J. Neurosci.* (2021).
- 195    10.   Kazazian, H. H., Jr & Moran, J. V. Mobile DNA in Health and Disease. *N. Engl. J. Med.*  
196           **377**, 361–370 (2017).
- 197    11.   Moran, J. V., DeBerardinis, R. J. & Kazazian, H. H., Jr. Exon shuffling by L1  
198           retrotransposition. *Science* **283**, 1530–1534 (1999).
- 199    12.   Denli, A. M. *et al.* Primate-specific ORF0 contributes to retrotransposon-mediated  
200           diversity. *Cell* **163**, 583–593 (2015).
- 201    13.   Moran, J. V. *et al.* High frequency retrotransposition in cultured mammalian cells. *Cell* **87**,  
202           917–927 (1996).
- 203    14.   Wei, W. *et al.* Human L1 retrotransposition: cispreference versus trans complementation.  
204           *Mol. Cell. Biol.* **21**, 1429–1439 (2001).
- 205    15.   Feng, Q., Moran, J. V., Kazazian, H. H., Jr & Boeke, J. D. Human L1 retrotransposon  
206           encodes a conserved endonuclease required for retrotransposition. *Cell* **87**, 905–916 (1996).
- 207    16.   Scott, E. C. *et al.* A hot L1 retrotransposon evades somatic repression and initiates human  
208           colorectal cancer. *Genome Res.* **26**, 745–755 (2016).
- 209    17.   Kuwabara, T. *et al.* Wnt-mediated activation of NeuroD1 and retro-elements during adult  
210           neurogenesis. *Nat. Neurosci.* **12**, 1097–1105 (2009).
- 211    18.   Muotri, A. R. *et al.* Somatic mosaicism in neuronal precursor cells mediated by L1  
212           retrotransposition. *Nature* **435**, 903–910 (2005).
- 213    19.   Athankar, J. N., Badge, R. M. & Moran, J. V. A YY1-binding site is required for accurate  
214           human LINE-1 transcription initiation. *Nucleic Acids Res.* **32**, 3846–3855 (2004).
- 215    20.   Tchénio, T., Casella, J. F. & Heidmann, T. Members of the SRY family regulate the human  
216           LINE retrotransposons. *Nucleic Acids Res.* **28**, 411–415 (2000).
- 217    21.   Deniz, Ö., Frost, J. M. & Branco, M. R. Regulation of transposable elements by DNA

- 218 modifications. *Nat. Rev. Genet.* **20**, 417–431 (2019).
- 219 22. de la Rica, L. *et al.* TET-dependent regulation of retrotransposable elements in mouse  
220 embryonic stem cells. *Genome Biol.* **17**, 234 (2016).
- 221 23. Castro-Diaz, N. *et al.* Evolutionally dynamic L1 regulation in embryonic stem cells. *Genes*  
222 *Dev.* **28**, 1397–1409 (2014).
- 223 24. Coufal, N. G. *et al.* L1 retrotransposition in human neural progenitor cells. *Nature* **460**,  
224 1127–1131 (2009).
- 225 25. Macia, A. *et al.* Engineered LINE-1 retrotransposition in nondividing human neurons.  
226 *Genome Res.* **27**, 335–348 (2017).
- 227 26. Ostertag, E. M., Prak, E. T., DeBerardinis, R. J., Moran, J. V. & Kazazian, H. H., Jr.  
228 Determination of L1 retrotransposition kinetics in cultured cells. *Nucleic Acids Res.* **28**,  
229 1418–1423 (2000).
- 230 27. Kopera, H. C. *et al.* LINE-1 cultured cell retrotransposition assay. *Methods Mol. Biol.* **1400**,  
231 139–156 (2016).
- 232 28. Sassaman, D. M. *et al.* Many human L1 elements are capable of retrotransposition. *Nat.*  
233 *Genet.* **16**, 37–43 (1997).
- 234 29. Dombroski, B. A., Scott, A. F. & Kazazian, H. H., Jr. Two additional potential  
235 retrotransposons isolated from a human L1 subfamily that contains an active  
236 retrotransposable element. *Proc. Natl. Acad. Sci. U. S. A.* **90**, 6513–6517 (1993).
- 237 30. Bowles, J., Schepers, G. & Koopman, P. Phylogeny of the SOX family of developmental  
238 transcription factors based on sequence and structural indicators. *Dev. Biol.* **227**, 239–255  
239 (2000).
- 240 31. Sun, X. *et al.* Transcription factor profiling reveals molecular choreography and key  
241 regulators of human retrotransposon expression. *Proc. Natl. Acad. Sci. U. S. A.* **115**, E5526–  
242 E5535 (2018).
- 243 32. Sinnamon, J. R. *et al.* The accessible chromatin landscape of the murine hippocampus at  
244 single-cell resolution. *Genome Res.* **29**, 857–869 (2019).
- 245 33. Corces, M. R. *et al.* Single-cell epigenomic analyses implicate candidate causal variants at  
246 inherited risk loci for Alzheimer’s and Parkinson’s diseases. *Nat. Genet.* **52**, 1158–1168  
247 (2020).
- 248 34. Bedrosian, T. A., Quayle, C., Novaresi, N. & Gage, F. H. Early life experience drives

- 249 structural variation of neural genomes in mice. *Science* **359**, 1395–1399 (2018).
- 250 35. Mo, A. *et al.* Epigenomic Signatures of Neuronal Diversity in the Mammalian Brain.  
251 *Neuron* **86**, 1369–1384 (2015).
- 252 36. Yuan, F. *et al.* Induction of human somatostatin and parvalbumin neurons by expressing a  
253 single transcription factor LIM homeobox 6. *Elife* **7**, e37382 (2018).
- 254 37. Sams, D. S. *et al.* Neuronal CTCF Is Necessary for Basal and Experience-Dependent Gene  
255 Regulation, Memory Formation, and Genomic Structure of BDNF and Arc. *Cell Rep.* **17**,  
256 2418–2430 (2016).
- 257 38. Donato, F., Rompani, S. B. & Caroni, P. Parvalbumin-expressing basket-cell network  
258 plasticity induced by experience regulates adult learning. *Nature* **504**, 272–276 (2013).
- 259 39. Han, J. S. & Boeke, J. D. A highly active synthetic mammalian retrotransposon. *Nature*  
260 **429**, 314–318 (2004).
- 261 40. Naas, T. P. *et al.* An actively retrotransposing, novel subfamily of mouse L1 elements.  
262 *EMBO J.* **17**, 590–597 (1998).
- 263 41. DeBerardinis, R. J., Goodier, J. L., Ostertag, E. M. & Kazazian, H. H. Rapid amplification  
264 of a retrotransposon subfamily is evolving the mouse genome. *Nat. Genet.* **20**, 288–290  
265 (1998).
- 266 42. Richardson, S. R. *et al.* Heritable L1 retrotransposition in the mouse primordial germline  
267 and early embryo. *Genome Res.* **27**, 1395–1405 (2017).
- 268 43. Schauer, S. N. *et al.* L1 retrotransposition is a common feature of mammalian  
269 hepatocarcinogenesis. *Genome Res.* **28**, 639–653 (2018).
- 270 44. Lavery, L. A. *et al.* Losing Dnmt3a dependent methylation in inhibitory neurons impairs  
271 neural function by a mechanism impacting Rett syndrome. *Elife* **9**, e52981 (2020).
- 272 45. Wu, H. *et al.* Dnmt3a-dependent nonpromoter DNA methylation facilitates transcription of  
273 neurogenic genes. *Science* **329**, 444–448 (2010).
- 274 46. Feng, J. *et al.* Dnmt1 and Dnmt3a maintain DNA methylation and regulate synaptic  
275 function in adult forebrain neurons. *Nat. Neurosci.* **13**, 423–430 (2010).
- 276 47. Muotri, A. R. *et al.* L1 retrotransposition in neurons is modulated by MeCP2. *Nature* **468**,  
277 443–446 (2010).
- 278 48. Ewing, A. D. *et al.* Nanopore Sequencing Enables Comprehensive Transposable Element  
279 Epigenomic Profiling. *Mol. Cell* **80**, 915–928.e5 (2020).

- 280 49. Sookdeo, A., Hepp, C. M., McClure, M. A. & Boissinot, S. Revisiting the evolution of  
281 mouse LINE-1 in the genomic era. *Mob. DNA* **4**, 3 (2013).
- 282 50. Shinoda, Y. *et al.* Calcium-dependent activator protein for secretion 2 (CAPS2) promotes  
283 BDNF secretion and is critical for the development of GABAergic interneuron network.  
284 *Proc. Natl. Acad. Sci. U. S. A.* **108**, 373–378 (2011).
- 285 51. Ratai, O. *et al.* An Alternative Exon of CAPS2 Influences Catecholamine Loading into  
286 LDCVs of Chromaffin Cells. *J. Neurosci.* **39**, 18–27 (2019).
- 287 52. Schmalbach, B. *et al.* Age-dependent loss of parvalbumin-expressing hippocampal  
288 interneurons in mice deficient in CHL1, a mental retardation and schizophrenia  
289 susceptibility gene. *J. Neurochem.* **135**, 830–844 (2015).
- 290 53. Chen, Y.-J. *et al.* ErbB4 in parvalbumin-positive interneurons is critical for neuregulin 1  
291 regulation of long-term potentiation. *Proc. Natl. Acad. Sci. U. S. A.* **107**, 21818–21823  
292 (2010).
- 293 54. ENCODE Project Consortium. An integrated encyclopedia of DNA elements in the human  
294 genome. *Nature* **489**, 57–74 (2012).
- 295 55. Faulkner, G. J. *et al.* The regulated retrotransposon transcriptome of mammalian cells. *Nat.*  
296 *Genet.* **41**, 563–571 (2009).
- 297 56. Jönsson, M. E. *et al.* Activation of neuronal genes via LINE-1 elements upon global DNA  
298 demethylation in human neural progenitors. *Nat. Commun.* **10**, 3182 (2019).
- 299 57. Fuchs, E. C. *et al.* Recruitment of parvalbumin-positive interneurons determines  
300 hippocampal function and associated behavior. *Neuron* **53**, 591–604 (2007).
- 301 58. Ognjanovski, N. *et al.* Parvalbumin-expressing interneurons coordinate hippocampal  
302 network dynamics required for memory consolidation. *Nat. Commun.* **8**, 15039 (2017).
- 303 59. Erwin, J. A., Marchetto, M. C. & Gage, F. H. Mobile DNA elements in the generation of  
304 diversity and complexity in the brain. *Nat. Rev. Neurosci.* **15**, 497–506 (2014).
- 305 60. McConnell, M. J. *et al.* Intersection of diverse neuronal genomes and neuropsychiatric  
306 disease: The Brain Somatic Mosaicism Network. *Science* **356**, eaal1641 (2017).
- 307 61. Muotri, A. R. & Gage, F. H. Generation of neuronal variability and complexity. *Nature* **441**,  
308 1087–1093 (2006).
- 309 62. Kano, H. *et al.* L1 retrotransposition occurs mainly in embryogenesis and creates somatic  
310 mosaicism. *Genes Dev.* **23**, 1303–1312 (2009).



- 311 63. Baillie, J. K. *et al.* Somatic retrotransposition alters the genetic landscape of the human  
312 brain. *Nature* **479**, 534–537 (2011).
- 313 64. Miki, Y. *et al.* Disruption of the APC gene by a retrotransposal insertion of L1 sequence in  
314 a colon cancer. *Cancer Res.* **52**, 643–645 (1992).
- 315 65. Howell, R. & Usdin, K. The ability to form intrastrand tetraplexes is an evolutionarily  
316 conserved feature of the 3' end of L1 retrotransposons. *Mol. Biol. Evol.* **14**, 144–155 (1997).
- 317 66. Muotri, A. R., Zhao, C., Marchetto, M. C. N. & Gage, F. H. Environmental influence on L1  
318 retrotransposons in the adult hippocampus. *Hippocampus* **19**, 1002–1007 (2009).
- 319 67. Francis, D. D., Diorio, J., Plotsky, P. M. & Meaney, M. J. Environmental enrichment  
320 reverses the effects of maternal separation on stress reactivity. *J. Neurosci.* **22**, 7840–7843  
321 (2002).
- 322 68. van Dellen, A., Blakemore, C., Deacon, R., York, D. & Hannan, A. J. Delaying the onset of  
323 Huntington's in mice. *Nature* **404**, 721–722 (2000).
- 324 69. Chen, C.-C., Lu, J., Yang, R., Ding, J. B. & Zuo, Y. Selective activation of parvalbumin  
325 interneurons prevents stress-induced synapse loss and perceptual defects. *Mol. Psychiatry*  
326 **23**, 1614–1625 (2018).
- 327 70. Zoicher, S., Overall, R. W., Lesche, M., Dahl, A. & Kempermann, G. Epigenetic  
328 rejuvenation of the hippocampus by environmental enrichment. *bioRxiv* (2019)  
329 doi:10.1101/776310.
- 330 71. Garcia-Perez, J. L. *et al.* LINE-1 retrotransposition in human embryonic stem cells. *Hum.*  
331 *Mol. Genet.* **16**, 1569–1577 (2007).
- 332 72. Alisch, R. S., Garcia-Perez, J. L., Muotri, A. R., Gage, F. H. & Moran, J. V.  
333 Unconventional translation of mammalian LINE-1 retrotransposons. *Genes Dev.* **20**, 210–  
334 224 (2006).
- 335 73. Paolino, A. *et al.* Differential timing of a conserved transcriptional network underlies  
336 divergent cortical projection routes across mammalian brain evolution. *Proc. Natl. Acad.*  
337 *Sci. U. S. A.* **117**, 10554–10564 (2020).
- 338 74. Blaess, S. *et al.* Temporal-spatial changes in Sonic Hedgehog expression and signaling  
339 reveal different potentials of ventral mesencephalic progenitors to populate distinct ventral  
340 midbrain nuclei. *Neural Dev.* **6**, 29 (2011).
- 341 75. Bao, W., Kojima, K. K. & Kohany, O. Repbase Update, a database of repetitive elements in

- 342 eukaryotic genomes. *Mob. DNA* **6**, 11 (2015).
- 343 76. Kumaki, Y., Oda, M. & Okano, M. QUMA: quantification tool for methylation analysis.  
344 *Nucleic Acids Res.* **36**, W170–5 (2008).
- 345 77. Faulkner, G. J. *et al.* A rescue strategy for multimapping short sequence tags refines surveys  
346 of transcriptional activity by CAGE. *Genomics* **91**, 281–288 (2008).
- 347 78. Lanciano, S. & Cristofari, G. Measuring and interpreting transposable element expression.  
348 *Nat. Rev. Genet.* **21**, 721–736 (2020).
- 349 79. Hashimoto, T. *et al.* Probabilistic resolution of multi-mapping reads in massively parallel  
350 sequencing data using MuMRRescueLite. *Bioinformatics* **25**, 2613–2614 (2009).
- 351 80. Dobin, A. *et al.* STAR: ultrafast universal RNA-seq aligner. *Bioinformatics* **29**, 15–21  
352 (2013).
- 353 81. Martin, M. Cutadapt removes adapter sequences from high-throughput sequencing reads.  
354 *EMBnet.journal* **17**, 10–12 (2011).
- 355 82. Li, H. Aligning sequence reads, clone sequences and assembly contigs with BWA-MEM.  
356 *arXiv [q-bio.GN]* arXiv:1303.3997 (2013).
- 357 83. Li, H. *et al.* The Sequence Alignment/Map format and SAMtools. *Bioinformatics* **25**, 2078–  
358 2079 (2009).
- 359 84. Zhang, Y. *et al.* Model-based analysis of ChIP-Seq (MACS). *Genome Biol.* **9**, R137 (2008).
- 360 85. Li, H. Minimap2: pairwise alignment for nucleotide sequences. *Bioinformatics* **34**, 3094–  
361 3100 (2018).
- 362 86. Simpson, J. T. *et al.* Detecting DNA cytosine methylation using nanopore sequencing. *Nat.*  
363 *Methods* **14**, 407–410 (2017).
- 364 87. Li, H. Tabix: fast retrieval of sequence features from generic TAB-delimited files.  
365 *Bioinformatics* **27**, 718–719 (2011).
- 366 88. Cheetham, S. W., Kindlova, M. & Ewing, A. D. Methylartist: Tools for Visualising  
367 Modified Bases from Nanopore Sequence Data. *bioRxiv* (2021).
- 368 89. Gubert, C. & Hannan, A. J. Environmental enrichment as an experience-dependent  
369 modulator of social plasticity and cognition. *Brain Res.* **1717**, 1–14 (2019).
- 370 90. Mazarakis, N. K. *et al.* ‘Super-Enrichment’ Reveals Dose-Dependent Therapeutic Effects of  
371 Environmental Stimulation in a Transgenic Mouse Model of Huntington’s Disease. *J.*  
372 *Huntingtons Dis.* **3**, 299–309 (2014).

- 373 91. Khan, A. *et al.* JASPAR 2018: update of the open-access database of transcription factor  
374 binding profiles and its web framework. *Nucleic Acids Res.* **46**, D260–D266 (2018).
- 375 92. Wang, F. *et al.* RNAscope: a novel in situ RNA analysis platform for formalin-fixed,  
376 paraffin-embedded tissues. *J. Mol. Diagn.* **14**, 22–29 (2012).
- 377 93. Bodea, L.-G. *et al.* Neurodegeneration by activation of the microglial complement-  
378 phagosome pathway. *J. Neurosci.* **34**, 8546–8556 (2014).
- 379 94. Filice, F., Vörckel, K. J., Sungur, A. Ö., Wöhr, M. & Schwaller, B. Reduction in  
380 parvalbumin expression not loss of the parvalbumin-expressing GABA interneuron  
381 subpopulation in genetic parvalbumin and shank mouse models of autism. *Mol. Brain* **9**,  
382 (2016).
- 383 95. O’Driscoll, C., Kaufmann, W. E. & Bressler, J. Relationship between *Mecp2* and NFκB  
384 signaling during neural differentiation of P19 cells. *Brain Res.* **1490**, 35–42 (2013).

385

#### 386 **Data availability**

387 ONT sequencing data (.fastq and .fast5) generated from hippocampal PV<sup>+</sup> and PV<sup>-</sup> cell pools are  
388 available from the European Nucleotide Archive (ENA) under accession number PRJEB47835.

389

#### 390 **Materials availability**

391 L1.3 retrotransposition assay constructs carrying mutant SOX6 binding sites are available from  
392 Geoffrey J. Faulkner and require a material transfer agreement.

393

#### 394 **Code availability**

395 Nanopore methylation analyses were performed with MethylArtist  
396 (<https://github.com/adamewing/methylartist>). Bisulfite sequencing results were visualized with  
397 QUMA (<http://quma.cdb.riken.jp/>). RNA-seq and ATAC-seq datasets were analyzed by  
398 pipelines joining together in serial published bioinformatic tools (see **Methods**).

399

#### 400 **Methods**

##### 401 ***Cultured PA-1 cell L1-EGFP assay***

402 Retrotransposition efficiency was measured for L1.3, a highly mobile human L1HS<sup>28,29</sup>, carrying  
403 an enhanced green fluorescent protein (EGFP) reporter cassette driven by a cytomegalovirus

404 promoter (CMVp), with the L1 expressed from its native promoter and delivered by a plasmid  
405 backbone also incorporating a puromycin resistance gene for selecting transfected cells<sup>13,26,27</sup>. In  
406 this system, the entire L1 3'UTR, with the thymine base deleted from within its native  
407 polyadenylation signal, precedes the EGFP cassette<sup>6</sup>. Vectors carrying wild-type and reverse  
408 transcriptase mutant<sup>13</sup> (D702A) L1.3 sequences, as well as L1.3 sequences with either of their  
409 5'UTR SOX binding sites scrambled or inverted<sup>20</sup>, were tested in cultured PA-1 cells, in normal  
410 media only and treated with trichostatin A prior to flow cytometry, as described previously<sup>6</sup>. L1  
411 constructs with altered SOX6 sites were built by PCR fusion using overlapping primers that  
412 included the desired mutations. The results shown in **Fig. 1b** are one representative experiment of  
413 three biological replicates showing a similar trend per assayed construct. As a quality check,  
414 plasmid transfection efficiencies were calculated by co-transfecting with pCEP-EGFP into each  
415 cell line<sup>71,72</sup>. No untransfected PA-1 cells survived treatment with puromycin, ensuring  
416 untransfected cells did not contribute to EGFP<sup>+</sup> cells on the day of analysis. Untransfected cells  
417 not treated with puromycin were used to set the EGFP<sup>+</sup> signal level in flow cytometry.

418

#### 419 *L1-EGFP transgenic mice*

420 To trace retrotransposition of an engineered L1 reporter *in vivo*, we generated a new transgenic  
421 L1-EGFP mouse line harboring L1.3, with epitope tags on ORF1p and ORF2p and an EGFP  
422 indicator cassette<sup>13,26</sup> embedded in its 3'UTR. To assemble the L1 transgene, we cloned the NotI-  
423 BstZ17I fragment from pJM101/L1.3-ORF1-T7-ORF2-3×FLAG (containing T7 gene 10 epitope  
424 tag on the C-terminus of ORF1 and a 3×FLAG tag on the C-terminus of ORF2) into p99-GFP-  
425 LRE3, yielding p99-GFP-L1.3-ORF1-T7-ORF2-3×FLAG. Both pJM101/L1.3-ORF1-T7-ORF2-  
426 3×FLAG and p99-GFP-LRE3 were kind gifts from Jose Garcia-Perez (University of Edinburgh).  
427 In p99-GFP-L1.3-ORF1-T7-ORF2-3×FLAG, transgene transcription was driven by the native  
428 L1.3 promoter, with an SV40 polyadenylation signal (pA) located downstream of the EGFP  
429 retrotransposition indicator cassette. The EGFP cassette was equipped with a cytomegalovirus  
430 (CMV) promoter and a herpes simplex virus type 1 (HSV) thymidine kinase (TK) polyadenylation  
431 signal, facilitating EGFP expression upon genomic integration via retrotransposition. In  
432 preparation for pronuclear injection, EGFP-L1.3-ORF1-T7-ORF2-3×FLAG was released by  
433 digestion with NotI and MluI restriction enzymes, separated from the vector backbone on a 0.7%  
434 agarose gel, purified by phenol-chloroform extraction, and eluted in microinjection buffer (7.5mM

435 Tris-HCl, 0.15mM EDTA pH7.4). Transgenic L1-EGFP mice were produced by the Transgenic  
436 Animal Service of Queensland (TASQ), University of Queensland, using a standard pronuclear  
437 injection protocol. Briefly, zygotes were collected from superovulated C57BL/6 females. The  
438 microinjection buffer containing EGFP-L1.3-ORF1-T7-ORF2-3×FLAG was then transferred to  
439 the zygote pronuclei. Successfully injected zygotes were transplanted into the oviducts of  
440 pseudopregnant females. Primers flanking the EGFP cassette were used to screen potential  
441 founders by PCR (**Supplementary Table 2**). Identified founder L1-EGFP animals were bred on a  
442 C57BL/6 background. All procedures were followed as approved by the University of Queensland  
443 Animal Ethics Committee (TRI/UQ-MRI/381/14/NHMRC/DFG and MRI-UQ/QBI/415/17).

444

#### 445 ***In utero electroporation***

446 Embryonic *in utero* electroporation was employed to simultaneously deliver control (pmCherry)  
447 and experimental (L1) plasmids. Here, pmCherry was a 4.7kb plasmid that expressed mCherry  
448 fluorescent protein under the control of a CMV promoter (Addgene 632524). L1 plasmids  
449 consisted of pUBC-L1SM-UBC-EGFP and pMut2-UBC-L1SM-UBC-EGFP. pUBC-L1SM-  
450 UBC-EGFP was a derivative of cep99-GFP-L1SM, which contained a full-length codon-  
451 optimized synthetic mouse L1 T<sub>F</sub> element (L1SM, kindly shared by Jef Boeke, NYU Langone)<sup>39</sup>,  
452 where mouse ubiquitin C (UBC) promoters were substituted for the CMV promoters used to drive  
453 L1SM and EGFP expression in cep99-GFP-L1SM. pMut2-UBC-L1SM-UBC-EGFP was identical  
454 to pUBC-L1SM-UBC-EGFP, apart from two non-synonymous mutations in the L1SM ORF2  
455 sequence known to disable ORF2p reverse transcriptase and endonuclease activities. *In utero*  
456 electroporation was performed as described previously<sup>73</sup>, with the day of mating defined as  
457 embryonic day 0 (E0). Briefly, time-mated pregnant CD1 mice were anesthetized at E14.5 via an  
458 intraperitoneal injection of ketamine/xylazine (120mg/kg ketamine and 10mg/kg xylazine).  
459 Embryos were exposed via a laparotomy and 0.5-1.0μL of plasmid DNA combined with 0.0025%  
460 Fast Green dye, to aid visualization, was injected into the lateral ventricle of each embryo using a  
461 glass-pulled pipette connected to a Picospritzer II (Parker Hannifin). Injections involved either  
462 combinations of pUBC-L1SM-UBC-EGFP and pmCherry (1μg/μL each) or pMut2-UBC-L1SM-  
463 UBC-EGFP and pmCherry (1μg/μL each). Half of the pups from each litter were co-injected with  
464 pUBC-L1SM-UBC-EGFP and pmCherry into the left hemisphere and the other half with pMut2-  
465 UBC-L1SM-UBC-EGFP and pmCherry into the right hemisphere. Plasmids were directed into the

466 forebrain by placement of 3mm diameter microelectrodes across the head, which delivered 5  
467 (100ms, 1Hz) approximately 36V square wave pulses via an ECM 830 electroporator (BTX). Once  
468 embryos were electroporated, uterine horns were replaced inside the abdominal cavity and the  
469 incision sutured closed. Dams received 1mL of Ringer's solution subcutaneously and an edible  
470 buprenorphine gel pack for pain relief. Dams were monitored daily until giving birth to live pups,  
471 which were collected for analysis at P10.

472

### 473 ***Histology***

474 Adult transgenic L1-EGFP mice (12-16 weeks) were anesthetized using isoflurane, and perfused  
475 intracardially with PBS and 4% PFA. CD1 pups, having been electroporated *in utero* with mouse  
476 L1-EGFP plasmids, were euthanized at postnatal day 10 by cervical dislocation. 12-week old  
477 CBA×C57BL/6 mice, intended for RNA FISH, were injected intraperitoneally with sodium  
478 pentobarbital (50mg/kg), followed by cervical dislocation to ensure euthanasia. All brains were  
479 dissected and fixed in PFA for 24h. For cryopreservation, fixed brains were immersed first in 15%  
480 sucrose and then 30% sucrose to submersion, and embedded in optimal cutting temperature (OCT)  
481 compound and stored at -80°C. Transgenic L1-EGFP animal brains were sectioned on a cryostat  
482 (Leica, settings OT=-20°C, CT=-20°C) at 40µm thickness. Free-floating sections were collected  
483 in PBS and stored at 4°C. CBA×C57BL/6 brains were sectioned on a cryostat (Leica, settings  
484 OT=-22°C, CT=-22°C) at 30µm thickness. Free-floating sections were collected in cryoprotectant  
485 (25% glycerol, 35% ethylene glycol, in PBS) and immediately stored at -20°C.

486 Tissue processing and immunofluorescent staining with primary and secondary antibodies  
487 were carried out as described previously<sup>74</sup>. Primary antibodies and dilutions were as follows: rabbit  
488 anti-GFP, 1:500 (Thermo Fisher A11122); chicken anti-GFP, 1:500 (Millipore AB16901); mouse  
489 anti-T7, 1:500 (Millipore 69522); rabbit anti-T7, 1:500 (Millipore AB3790); goat anti-tdTomato,  
490 1:1000 (Sicgen T2200); mouse anti-NeuN, 1:250 (Millipore MAB377); guinea pig anti-NeuN,  
491 1:250 (Millipore ABN90), rabbit anti-Gad65/67 (GAD1), 1:500 (Sigma G5163); mouse anti-  
492 parvalbumin (PV), 1:2000 (Sigma P3088); rabbit anti-β tubulin III (Tub), 1:500 (Sigma T2200);  
493 rabbit anti-MeCP2, 1:500 (Abcam ab2828). Secondary antibodies and dilutions were as follows:  
494 donkey anti-guinea pig Dylight 405, 1:200 (Jackson ImmunoResearch 706475148); donkey anti-  
495 mouse Dylight 405, 1:200 (Jackson ImmunoResearch 715475150); donkey anti-chicken Alexa  
496 Fluor 488, 1:500 (Jackson ImmunoResearch 703546155); donkey anti-rat Alexa Fluor 488, 1:500

497 (Jackson Immunoresearch 712546150); donkey anti-rabbit Alexa Fluor 488, 1:500 (Thermo  
498 Fisher A21206); donkey anti-goat Alexa Fluor 594, 1:500 (Jackson Immunoresearch 705586147);  
499 donkey anti-rabbit Cy3, 1:200 (Jackson Immunoresearch 711165152); donkey anti-mouse Cy3,  
500 1:500 (Jackson Immunoresearch 715165150); donkey anti-guinea pig Alexa Fluor 647, 1:500  
501 (Millipore AP193SA6); donkey anti-mouse Alexa Fluor, 1:500 (Jackson Immunoresearch  
502 715606150). For nuclei labelling: BisBenzimide H33258 (Sigma B2883). Blocking serum: normal  
503 donkey serum (Jackson Immunoresearch 017000121).

504

### 505 ***Imaging***

506 EGFP<sup>+</sup> cells were imaged on a Zeiss LSM510 confocal microscope. Acquisition of high  
507 magnification, Z-stack images was performed with Zen 2009 software. Images of EGFP, NeuN  
508 and PV immunostaining for quantification were taken from hippocampal and adjacent cortical  
509 areas using a Zeiss AxioObserver Z1 microscope and Zen 2009 software, equipped with an  
510 ApoTome system and a 10× objective. Visualization and imaging of EGFP, NeuN and PV in *in*  
511 *utero* electroporated mice was performed using a Zeiss Plan-Apochromat 20x/0.8 NA air objective  
512 and a Plan-Apochromat 40x/1.4 NA oil-immersion objective on a confocal/two-photon laser-  
513 scanning microscope (LSM 710, Carl Zeiss Australia) built around an Axio Observer Z1 body and  
514 equipped with two internal gallium arsenide phosphide (GaAsP) photomultiplier tubes (PMTs)  
515 and three normal PMTs for epi- (descanned) detection and two external GaAsP PMTs for non-  
516 descanned detection in two-photon imaging, and controlled by Zeiss Zen Black software. RNA  
517 FISH for sections of hippocampus and adjacent cortical areas, as well as MeCP2, NeuN and PV  
518 immunostainings were imaged on a spinning-disk confocal system (Marianas; 3I, Inc.) consisting  
519 of a Axio Observer Z1 (Carl Zeiss) equipped with a CSU-W1 spinning-disk head (Yokogawa  
520 Corporation of America), ORCA-Flash4.0 v2 sCMOS camera (Hamamatsu Photonics), using a  
521 63x/1.4 NA C-Apo objective and a 20x/0.8 NA Plan-Apochromat objective, respectively. All Z-  
522 stack spinning-disk confocal image acquisition was performed using SlideBook 6.0 (3I, Inc). PV  
523 stereology was performed on an upright Axio Imager Z2 fluorescent microscope (Carl Zeiss)  
524 equipped with a motorized stage and Stereo Investigator software (MBF Bioscience). Contours  
525 were drawn based on DAPI staining using a 5x/0.16 NA objective. Counting was performed on a  
526 10x/0.3 NA objective. All image processing and analysis post acquisition were performed using  
527 Fiji for Windows (ImageJ 1.52d).

528

### 529 ***Single molecule RNA fluorescence in situ hybridization (FISH)***

530 Two custom RNAscope probes were designed against the RepBase<sup>75</sup> L1 T<sub>FI</sub> subfamily consensus  
531 sequence (**Extended Data Fig. 3**). L1 probe A (design #NPR-0003768, Advanced Cell  
532 Diagnostics, Cat. #ADV827911C3) targeted the L1 T<sub>FI</sub> 5'UTR monomeric and non-monomeric  
533 region (consensus positions 827 to 1688). L1 probe B (design #NPR-000412, Advanced Cell  
534 Diagnostics, Cat. #ADV831481C3) targeted the L1 T<sub>FI</sub> 5'UTR monomeric region (consensus  
535 positions 142 to 1423). Weak possible off-target loci for probe A and B comprised the pseudogene  
536 Gm-17177, two non-coding RNAs (LOC115486508 for probe A and LOC115490394 for probe  
537 B) and a minor isoform of the PPCDC gene (only for probe A), none of which were expressed  
538 beyond very low levels or with specificity to PV<sup>+</sup> neurons. Using the L1 T<sub>F</sub> RNAscope probes, we  
539 performed fluorescence *in situ* hybridization (FISH) on fixed, frozen brain tissue according to the  
540 manufacturer's specifications (RNAscope Fluorescent Multiplex Reagent Kit part 2, Advanced  
541 Cell Diagnostics, Cat. #320850) and with the following modifications: 30µm coronal sections  
542 instead of 15µm, and boiling in target retrieval solution for 10min instead of 5min. To identify  
543 neurons, we performed immunohistochemistry using a rabbit anti-β-tubulin antibody (Sigma Cat.  
544 #T2200) and donkey anti-rabbit Cy3 secondary antibody (Jackson ImmunoResearch, Cat.  
545 #711165152) following a previously described protocol<sup>74</sup>. To identify PV<sup>+</sup> neurons we employed  
546 a validated mouse PV RNAscope probe (Mm-Pvalb-C2, Advanced Cell Diagnostics, Cat.  
547 #ADV421931C2). Probes for the ubiquitously expressed mouse peptidylprolyl isomerase B  
548 (PPIB) gene and *Escherichia coli* gene *dapB* were used as positive and negative controls,  
549 respectively, for each FISH experiment.

550

### 551 ***Cell quantifications***

552 *L1 T<sub>F</sub>* and *PV RNA FISH*: We analyzed four hippocampal sections per animal for each L1 T<sub>F</sub>  
553 5'UTR probe (**Extended Data Fig. 3**) using Imaris 9.5.1 (Bitplane, Oxford Instruments). To render  
554 3D visualizations for a given neuron, we used Tub and DAPI staining to outline its soma and  
555 nucleus along Z-stack planes where the cell was detected. We set voxels outside the cell, and inside  
556 the nucleus, to a channel intensity value of zero to only retain cytoplasmic L1 mRNA signal and  
557 avoid nuclear L1 DNA. We then calculated the mean intensity of the L1 and PV channels within  
558 the cytoplasm. To quantify relative L1 T<sub>F</sub> mRNA expression in PV<sup>+</sup>/Tub<sup>+</sup> versus PV<sup>-</sup>/Tub<sup>+</sup> neurons



559 we normalized values to the mean value of PV<sup>-</sup>/Tub<sup>+</sup> neurons from each mouse. As a result, data  
560 from PV<sup>-</sup>/Tub<sup>+</sup> neurons are presented as mean intensity raw values. *MeCP2*: To quantify MeCP2  
561 protein expression we analyzed two hippocampal sections per animal. For each cell, we drew the  
562 contours of NeuN immunostaining along the relevant Z-stack planes and rendered a cell 3D  
563 visualization. We then calculated the mean MeCP2 channel intensity in PV<sup>+</sup>/NeuN<sup>+</sup> and PV<sup>-</sup>  
564 /NeuN<sup>+</sup> neurons. *PV stereology*: We stained and analyzed every 12th hippocampal section per  
565 animal. Cell density was calculated using the total number of PV<sup>+</sup> cells and the total subregion  
566 area from ~6 sections per animal. *LI-EGFP*: To quantify EGFP<sup>+</sup> cells we stained and analyzed  
567 every 12th hippocampal section (again, ~6 sections per animal). To visualize colocalization, we  
568 used Adobe Photoshop CC 2017. We counted EGFP<sup>+</sup>, EGFP<sup>+</sup>/NeuN<sup>+</sup> and EGFP<sup>+</sup>/PV<sup>+</sup> cells across  
569 the entire hippocampus and adjacent cortex. The average number of double-labeled cells per  
570 100mm<sup>2</sup> was determined for each animal. All statistical analyses were performed using Prism  
571 (v8.3.1)

572

### 573 ***Cell sorting and nucleic acid isolation***

574 Neonate litters were obtained from time-mated C57BL/6 mice bred in-house at the QBI animal  
575 facility. The day of birth was defined as postnatal day 0 (P0). From each P0 litter of ~6 pups we  
576 dissected and pooled hippocampus tissue. Tissues were dissociated in a papain solution, containing  
577 approximately 20U papain (Worthington) and 0.025mg DNase I (Worthington). Prior to use,  
578 papain was dissolved in HBSS (Gibco) with 1.1mM EDTA (Invitrogen), 0.067mM  
579 mercaptoethanol (Sigma) and 5mM cysteine-HCL (Sigma), and diluted in Hibernate E medium  
580 (Gibco). Tissue was incubated for 10min at 37°C with 0.5mL papain solution per embryo.  
581 Following digestion, the cell suspension was passed through a 70µm mesh cell strainer, washed  
582 into Hibernate E supplemented with B27 (Gibco) and then centrifuged at 300g for 5min. From this  
583 point in the protocol onwards, reagents were pre-chilled and the remaining procedures performed  
584 on ice. The cell pellet was resuspended in a blocking buffer (HBSS with 5% BSA). A rabbit anti-  
585 PV conjugated Alexa Fluor 647 antibody (Bioss bs-1299R-A647, dilution 1:2000) was directly  
586 added to the blocking buffer cell suspension and incubated for 1h at 4°C, then passed through a  
587 40µm mesh cell strainer and subjected to flow cytometry. The cell suspension was run through a  
588 100µm nozzle at low pressure (28psi) on a BD FACSAria II flow cytometer (Becton Dickinson).  
589 This first sort isolated PV<sup>+</sup> and PV<sup>-</sup> cells. To further isolate PV<sup>-</sup> neurons, PV<sup>-</sup> cells from the first

590 sort were collected in tubes containing 40U RNaseOUT ribonuclease inhibitor (Invitrogen), then  
591 fixed in ice cold 50% ethanol for 5min and centrifuged at 300g for 7min. Following centrifugation,  
592 cells were immunostained in blocking buffer containing mouse anti-beta III Tubulin (Tub)  
593 conjugated Alexa Fluor 488 antibody (Abcam ab195879, dilution 1:1000) and DAPI (Sigma  
594 D9542, 1 $\mu$ g/mL) for 15min at 4°C. Tub<sup>+</sup> immunostained cells were subjected to a second sort on  
595 the same FACS machine and specification as above. Four populations of cells were collected: PV<sup>+</sup>  
596 and PV<sup>-</sup> (**Extended Data Fig. 5a**, sort 1) and PV<sup>-</sup>/Tub<sup>+</sup> and PV<sup>-</sup>/Tub<sup>-</sup> (**Extended Data Fig. 5a**,  
597 sort 2). DNA and RNA were then extracted from each cell population. For RNA extractions, cells  
598 were sorted directly into the lysis buffer provided in the NucleoSpin RNA XS kit (Macherey  
599 Nagel), with RNA extraction performed following the manufacturer's specifications, except  
600 DNase treatment was performed on a column twice for 20min, instead of once for 15min. For  
601 DNA extraction, purified cells were collected into a DNA lysis buffer containing TE buffer (10mM  
602 Tris-HCl pH 8 and 0.1mM EDTA), 2% SDS and 100 $\mu$ g/mL proteinase K, and DNA was extracted  
603 following a standard phenol-chloroform protocol.

604

#### 605 ***Quantitative PCR on sorted cells and bulk hippocampus***

606 Total RNA extracted from purified PV<sup>+</sup>, PV<sup>-</sup>, PV<sup>-</sup>/Tub<sup>+</sup> and PV<sup>-</sup>/Tub<sup>-</sup> (**Extended Data Fig. 5a**,  
607 sorts 1 and 2) populations was used as input for SYBR Green and TaqMan qPCR assays. qPCR  
608 reactions were carried out using 300pg RNA/ $\mu$ L from purified PV<sup>+</sup> and PV<sup>-</sup> cells and 100pg  
609 RNA/ $\mu$ L from purified PV<sup>-</sup>/Tub<sup>+</sup> and PV<sup>-</sup>/Tub<sup>-</sup> cells. An RNA integrity number (RIN) above 6, as  
610 measured on an Agilent Bioanalyzer (Agilent Technologies, RNA 6000 Pico Kit, Cat. #5067-  
611 1513), was set as the minimum cutoff for RNA quality. All qPCRs were carried out on a  
612 LightCycler 480 Real-Time PCR system (Roche Life Science). Oligonucleotide PCR primers, as  
613 listed in **Supplementary Table 2**, were purchased from Integrated DNA Technologies. *SYBR*  
614 *Green assay*: PCR reactions were prepared using the Power SYBR Green RNA-to-CT 1 step kit  
615 (Applied Biosystems, Cat. #4391112). Reactions contained a 2 $\times$  Power SYBR Green RT-PCR  
616 Mix, 10pmol of each primer, 1 $\mu$ L RNA input template and 1 $\times$  reverse transcriptase enzyme mix  
617 in a 10 $\mu$ L final volume. Cycling conditions were as follows: 48°C for 30min, 95°C for 10min,  
618 followed by 40 cycles of 95°C, 15sec; 60°C, 1min. To assess potential DNA contamination, an L1  
619 T<sub>F</sub> qPCR using primers L1Md\_5UTR\_F and L1Md\_5UTR\_R was performed with and without  
620 reverse transcriptase. A three or more cycle difference between experiments run with and without

621 reverse transcriptase, and detection after cycle 30 in the latter, was considered as non-DNA  
622 contaminated RNA. *TaqMan assay*: Applied Biosystems custom L1, URR1 and 5S rRNA  
623 TaqMan MGB probes, as listed in **Supplementary Table 2**, were purchased from Thermo Fisher  
624 (Cat. #4316032), as was a proprietary mouse GAPDH combination (Cat. #4352339E). TaqMan  
625 qPCR reactions contained: 4× TaqPath 1-Step RT-qPCR multiplex reaction master mix  
626 (ThermoFisher, Cat. #A28521), 4pmol of each primer, 1pmol probe (with the exception of the  
627 ORF2/URR1 TaqMan reaction, for which we used 1pmol ORF2 primers) and 1μL RNA input  
628 template in a 10uL final volume. Cycling conditions were as follows: 37°C for 2min; 50°C for  
629 15min; 95°C for 2min, followed by 40 cycles of 95°C, 3sec; 60°C, 30sec. TaqMan assays for L1  
630 were multiplexed with assays for either 5S rRNA, GAPDH or URR1 controls. L1 probes were  
631 conjugated to VIC or 6FAM fluorophores. Controls were conjugated to HEX, VIC or 6FAM  
632 fluorophores. Primer/probe sequences and the associated detection channels are listed in  
633 **Supplementary Table 2**. For each assay, the relative mRNA expression in a particular sample  
634 was calculated by the delta delta-CT method, using the negative population in the respective sort  
635 as control, i.e. PV<sup>+</sup> was compared to PV<sup>-</sup> (**Extended Data Fig. 5a**, sort 1) and PV<sup>-</sup>/Tub<sup>+</sup> compared  
636 to PV<sup>-</sup>/Tub<sup>-</sup> (**Extended Data Fig. 5a**, sort 2). As the PV<sup>-</sup>/Tub<sup>+</sup> and PV<sup>-</sup>/Tub<sup>-</sup> populations were  
637 isolated as a result of two sortings in serial, for some assays sufficient RNA was only available to  
638 perform qPCR on PV<sup>+</sup> and PV<sup>-</sup> populations. For qPCR on bulk hippocampus, tissue was isolated  
639 from 12-week old animals housed in standard (STD, N=12) and enriched (ENR, N=14)  
640 environments. RNA extraction was performed by Trizol following the manufacturer's  
641 specifications (Trizol reagent, Invitrogen Cat. #15596026). Quantitative TaqMan PCR assays were  
642 performed as described above, using 40ng of RNA as input.

643

#### 644 ***CAPS2.L1 5'RACE and RT-PCR***

645 For 5'RACE, hippocampus tissue from three adult C57BL/6 mice was pooled and RNA extracted  
646 (Trizol reagent, Invitrogen Cat. #15596026). RNA was used as input for a FirstChoice RLM-  
647 RACE Kit (Invitrogen, Cat. #AM1700) to generate cDNA from capped, full-length mRNAs,  
648 following the manufacturer's specifications. Total RNA extracted from purified PV<sup>+</sup>, PV<sup>-</sup> and  
649 pooled neonate hippocampi was reverse transcribed using a High-Capacity cDNA Reverse  
650 Transcription Kit (Invitrogen, Cat. #4368814). PCR amplification was then performed using 1U  
651 MyTaq HS DNA Polymerase (BioLine) in 1× MyTaq buffer, 10pmol primer CAPS2.L1\_F,

652 10pmol primer CAPS2.L1\_R, 1μL cDNA in a 20μL final volume reaction. PCR cycling conditions  
653 were as follows: 95°C for 1min, (95°C for 15sec; 55°C for 15sec; 72°C for 10sec)×38, 72°C for  
654 5min. Reaction products were run on a 1.5% agarose gel in 1×TAE, stained with SYBR Safe DNA  
655 gel stain.

656

### 657 *L1 T<sub>F</sub> promoter bisulfite sequencing*

658 Targeted bisulfite sequencing was performed as described previously<sup>43</sup> to assess L1 T<sub>F</sub> 5'UTR  
659 monomer CpG methylation genome-wide. Briefly, this involved extraction of genomic DNA from  
660 PV<sup>+</sup>, PV<sup>-</sup> and PV<sup>-</sup>/Tub<sup>+</sup> populations purified from hippocampus tissue pooled from neonate  
661 littermates (**Extended Data Fig. 5**). Approximately 4×10<sup>4</sup> events per population were obtained  
662 from each of 3 litters (experimental triplicates). DNA was extracted via a conventional phenol-  
663 chloroform method and ethanol precipitation aided by glycogen (Ambion). DNA concentration  
664 was assessed with a Qubit dsDNA HS assay kit. Next, 20ng of genomic DNA was bisulfite  
665 converted using the EZ-DNA Methylation Lightning kit (Zymo Research, Cat #D5030) following  
666 the manufacturer's specifications. Bisulfite PCR reactions used MyTaq HS DNA polymerase  
667 (Bioline), and contained 1× reaction buffer, 12.5pmol of each primer, 2μL bisulfite treated DNA  
668 input template and 1U of enzyme in a 25μL final volume. PCR cycling conditions were as follows:  
669 95°C for 2min, followed by 40 cycles of 95°C, 30sec; 54°C, 30sec; 72°C, 30sec and 1 cycle of  
670 72°C, 5min. Primer sequences (BS\_L1\_TF\_F and BS\_L1\_TF\_R) were as provided in  
671 **Supplementary Table 2**. PCR products were visualized by electrophoresis on a 2% agarose gel,  
672 followed by the excision of fragments of expected size and DNA extracted using a MinElute gel  
673 extraction kit (Qiagen, Cat #28604) following the manufacturer's specifications. DNA  
674 concentration was assessed with a Qubit dsDNA HS assay kit and 30ng converted DNA was used  
675 as input for library preparation. Libraries were prepared using a NEBNext Ultra II DNA library  
676 prep kit (NEB, E7645S) and NEBNext Multiplex Oligos for Illumina (NEB, Cat# E6609S).  
677 Libraries were eluted in 15μL H<sub>2</sub>O and concentrations measured with an Agilent 2100 Bioanalyzer  
678 using an Agilent HS DNA kit (Agilent Technologies, Cat. 5067-4627). Barcoded libraries of PV<sup>+</sup>  
679 and PV<sup>-</sup>/Tub<sup>+</sup> populations from each of the 3 litters were mixed in equimolar quantities, diluted to  
680 8nM, and combined with 50% PhiX spike-in control (Illumina, Cat #FC-110-3001). Single-end  
681 300mer sequencing was then performed on a MiSeq platform (Illumina) using a MiSeq Reagent  
682 v3 kit (Illumina, Cat #MS-102-3003). Data were then analyzed as described elsewhere<sup>6</sup>. To

683 summarize, reads with the L1 T<sub>F</sub> bisulfite PCR primers at their termini were retained and aligned  
684 to the mock converted T<sub>F</sub> monomer target amplicon sequence with blastn. Reads where non-CpG  
685 cytosine bisulfite conversion was <95%, or ≥5% of CpG dinucleotides were mutated, or ≥5% of  
686 adenine and guanine nucleotides were mutated, were removed. 100 reads per triplicate cell  
687 population, excluding identical bisulfite sequences, were randomly selected and analyzed using  
688 QUMA<sup>76</sup> with default parameters, with strict CpG recognition.

689

### 690 ***RNA-seq analysis***

691 The mappability of individual TE copies generally varies as a function of sequencing read length,  
692 as well as TE subfamily age and copy number<sup>77,78</sup>. We therefore adapted a prior approach to  
693 quantify young mouse (L1 T<sub>F</sub>) and human (L1HS and L1PA2) subfamily-level transcript  
694 abundance with RNA-seq<sup>55,77,79</sup>. Analyzed datasets included Sams *et al.*<sup>37</sup>, bulk hippocampus  
695 single-end (1×61mer) RNA-seq obtained from wild-type and conditional CTCF knockout animals  
696 (SRA: SRP078142, N=3 pools of 2 animals per group), and Yuan *et al.*<sup>36</sup> bulk single-end  
697 (1×49mer) RNA-seq of neurons differentiated *in vitro* from human induced pluripotent stem cells,  
698 with and without LHX6 overexpression (SRA: SRP147748, N=3 per group). For each RNA-seq  
699 library, we aligned reads to the reference genome (mouse: mm10, human: hg38) genome assembly  
700 with STAR<sup>80</sup> version 2.6 (parameters --twopassMode Basic --outSAMprimaryFlag AllBestScore  
701 --winAnchorMultimapNmax 1000 --outFilterMultimapNmax 1000) and marked duplicate reads  
702 with Picard MarkDuplicates (<http://broadinstitute.github.io/picard>). We expected the high copy  
703 number and limited divergence of young L1 subfamilies to cause most of the corresponding RNA-  
704 seq reads to “multi-map” to multiple genomic loci<sup>77,78</sup>. As conceived previously, we assigned  
705 multi-map reads a weighting at each of their aligned positions based on the abundance of uniquely  
706 mapping reads aligned within 100bp in the same library<sup>55,77,79</sup>. Each position was then assigned a  
707 weighting proportionate to the fraction of uniquely mapped reads found there, out of the total  
708 number of uniquely mapped reads within 100bp of any mapping position for the multi-mapping  
709 read. If no uniquely mapped reads were found near any of the aligned positions for a multi-mapped  
710 read, all positions were given an equal weighting. We then intersected the unique and weighted  
711 multi-map alignments with RepeatMasker coordinates and produced a total read count for L1 T<sub>F</sub>  
712 (RepeatMasker: “L1Md\_T”), L1HS and L1PA2 genome-wide, normalized by dividing by the total  
713 mapped read count for that RNA-seq library (tags-per-million).

714

### 715 ***Bulk ATAC-seq analysis***

716 Mouse cortex ATAC-seq data were previously generated by Mo *et al.*<sup>35</sup> for excitatory pyramidal  
717 neurons (marked by CAM2KA), PV interneurons and VIP interneurons, via the isolation of nuclei  
718 tagged in specific cell types (INTACT) method. Paired-end fastq files were obtained from the  
719 Sequence Read Archive (SRA identifiers SRR1647880-SRR1647885). Trim Galore (parameters -  
720 -max\_n 2 --length 50 --trim-n) was used to apply CutAdapt<sup>81</sup> to read pairs to trim adapters and low  
721 quality bases. Processed reads were aligned to the reference genome (mm10) using bwa mem<sup>82</sup>  
722 with parameters (-a) to output all multimapping alignments. Alignments were filtered to keep only  
723 those with an alignment score equal to the maximum achieved for that read. The resultant bam  
724 files were sorted using samtools<sup>83</sup>. Peaks for each combined pair of duplicate experiments were  
725 called using MACS2<sup>84</sup> with default parameters, intersected with young L1 genomic coordinates,  
726 and then used to calculate the fraction of reads in each replicate aligned to at least one L1-  
727 associated peak.

728

### 729 ***scATAC-seq analyses***

730 Mouse hippocampus scATAC-seq data reported by Sinnamon *et al.*<sup>32</sup> were obtained from the SRA  
731 (identifiers SRR7749424 and SRR7749425). Only reads corresponding to the 2,346 cell identifiers  
732 reported by Sinnamon *et al.* were retained. Human hippocampus scATAC-seq data were reported  
733 by Corces *et al.*<sup>33</sup> (SRA identifiers SRR11442501 and SRR11442502). Human read pairs were  
734 retained if the corresponding barcode was present in the 10x Genomics scATAC-seq Unique  
735 Molecular Identifier (UMI) whitelist (737K version 1). Human and mouse read pairs were  
736 processed and aligned as per the bulk ATAC-seq above, using the hg38 and mm10 reference  
737 genome assemblies, respectively. Cells (UMIs) with fewer than 10,000 uniquely aligned read pairs  
738 were discarded. For each cell, we then determined the TPM fraction of reads overlapping -1000bp  
739 to +500bp of the annotated genomic start position of at least one young L1. For the mouse analysis,  
740 2,629 young full-length (>6kbp) T<sub>F</sub> L1s were identified “L1Md\_T” as listed by the UCSC Genome  
741 Browser RepeatMasker track. For the human analysis, a cohort of 840 full-length (>5.9kbp) L1HS  
742 and L1PA2 elements defined previously<sup>6</sup> were employed. Cells were grouped based on having at  
743 least one read aligned within the genomic coordinates of a given gene, with these coordinates  
744 defined as the first 50kbp of genes longer than 50kbp. The average fraction of young L1-associated

745 reads was then calculated for each cell group, compared to all other cells. To assess the statistical  
746 significance of the observed L1-associated read fractions, permutation tests were performed to  
747 determine this fraction for random resamplings of the same number of cell identifiers, with  $10^3$   
748 permutations.

749

### 750 *Nanopore methylation analysis*

751 High molecular weight DNA was extracted using a Nanobind CBB Big DNA Kit (Circulomics,  
752 NB-900-001-01) from PV<sup>+</sup> and PV<sup>-</sup> (**Extended Data Fig. 5**) populations purified from 10 neonate  
753 (P0) littermate hippocampus sample pools. DNA samples were sheared to ~10kb average size,  
754 prepared as barcoded libraries using a Ligation Sequencing Kit (Oxford Nanopore Technologies,  
755 SQK-LSK109), and sequenced on two flow cells of an ONT PromethION platform (Kinghorn  
756 Centre for Clinical Genomics, Australia). Bases were called with Guppy 4.0.11 (Oxford Nanopore  
757 Technologies) and reads aligned to the mm10 reference genome using minimap2 version 2.20<sup>85</sup>  
758 and samtools version 1.12<sup>83</sup>. Reads were indexed and per-CpG methylation calls generated using  
759 nanopolish version 0.13.2<sup>86</sup>. Methylation likelihood data were sorted by position and indexed using  
760 tabix version 1.12<sup>87</sup>. Methylation statistics for the genome divided into 10kbp bins, and reference  
761 TEs defined by RepeatMasker coordinates (<http://www.repeatmasker.org/>), were generated using  
762 MethylArtist version 1.0.4<sup>88</sup>, using commands db-nanopolish, segmeth and segplot with default  
763 parameters. Only full-length (>6kbp) L1s were included. Methylation profiles for individual loci  
764 were generated using the MethylArtist command locus, where parameters specified a 30bp sliding  
765 window with a 2bp step, and smoothed with a window size of 8 for the Hann function. To identify  
766 individual differentially methylated TEs (**Supplementary Table 1**), we required elements to have  
767 at least 4 reads and 20 methylation calls in each sample. Comparisons were carried out via Fisher's  
768 Exact Test using methylated and non-methylated call counts, with significance defined as a  
769 Bonferroni corrected P value of less than 0.01.

770

### 771 *Environmental enrichment and exercise experimental design*

772 At six weeks of age, CBA×C57BL/6 mice were randomly assigned to either a standard (STD),  
773 enriched (ENR) environment or exercise (EXE) group, as described previously<sup>68</sup>. All mice were  
774 exposed to their assigned housing condition for 6 weeks. Briefly, STD housing consisted of an  
775 open-top standard mouse cage (34 × 16 × 16cm; 4 mice/box) with basic bedding and nesting

776 materials. ENR and EXE mice were housed in larger cages (40 × 28 × 18cm; 4 mice/box)  
777 containing the same basic bedding and nesting materials as the STD plus specific features. ENR  
778 cages contained climbing and tunneling objects together with inanimate objects of various textures,  
779 sizes, and shapes, which altogether confer the enhancement of sensory, cognitive and motor  
780 stimulation<sup>89</sup>. These cages were changed weekly to ensure novelty for ENR mice. In addition, from  
781 week ten, ENR mice were exposed three times a week for one hour to an extra ‘super-enriched’  
782 condition in a larger playground arena (diameter: 57cm, height: 90cm) as previously described<sup>90</sup>.  
783 Each EXE cage contained two running wheels (12cm in diameter) to ensure mice had access to  
784 voluntary wheel running. Running wheels were excluded from the ENR housing to ensure the  
785 effects of physical activity were exclusive to the EXE mice. All mice had *ad libitum* access to food  
786 and water and were housed in a controlled room at 22°C and 45% humidity on a 12:12 hour  
787 light/dark cycle. All procedures were approved by The Florey Institute of Neuroscience and  
788 Mental Health Animal Ethics Committee (19-012-FINMH) and were performed in accordance  
789 with the relevant guidelines and regulations of the Australian National Health and Medical  
790 Research Council Code of Practice for the Use of Animals for Scientific Purposes.



**Supplementary Table 2.** Primer and probe information.

| Name                 | Sequence                                  | Target                         | Assay         | Source       |
|----------------------|-------------------------------------------|--------------------------------|---------------|--------------|
| BS_L1TFI/II_F        | GTTGAGGTAGTATTTTGTGTGGGT                  | L1 T <sub>FI/II</sub><br>5'UTR | Bisulfite PCR | 43           |
| BS_L1TFI/II_R        | TTCCAAAACTATCAAATTCTCTAAC                 | L1 T <sub>FI/II</sub><br>5'UTR | Bisulfite PCR | 43           |
| URR1_F               | GTAGCAAAATTATAGTTATGAAGTA GC              | URR1                           | TaqMan qPCR   | This study.  |
| URR1_R               | CTCAACCTTCCTAATGCT                        | URR1                           | TaqMan qPCR   | This study.  |
| URR1 probe           | HEX-TCACCACAACATGAGGAAGTGTATTA<br>-MGBNFQ | URR1                           | TaqMan qPCR   | This study.  |
| L1TFnonmon_F         | AGGTCCAAATACAAGATATCTGC                   | L1 T <sub>F</sub><br>5'UTR     | TaqMan qPCR   | This study.  |
| L1TFnonmon_R         | ATCAGCAGACCTGGGAGACA                      | L1 T <sub>F</sub><br>5'UTR     | TaqMan qPCR   | This study.  |
| L1TFnonmon<br>probe  | FAM-TGCCAGCAGAGAGTGCTCTGAGC<br>-MGBNFQ    | L1 T <sub>F</sub><br>5'UTR     | TaqMan qPCR   | This study.  |
| TaqORF2 Fw           | CATCAATGTAATCCATTATATAAAC                 | L1 T <sub>F</sub> ORF2         | TaqMan qPCR   | This study.  |
| TaqORF2 Rv           | TTTATCATGAATGGGTGTTG                      | L1 T <sub>F</sub> ORF2         | TaqMan qPCR   | This study.  |
| TaqORF2 probe        | FAM-CACATGATCATCTCGTTAGATGCAGA<br>-MGBNFQ | L1 T <sub>F</sub> ORF2         | TaqMan qPCR   | This study.  |
| Mouse GAPDH<br>assay | Proprietary VIC@/MGB probe and primers    | GAPDH                          | TaqMan qPCR   | ThermoFisher |
| L1Md_5UTR_F          | CAGCCGGCCACCTTCC                          | L1 T <sub>FI/II</sub><br>5'UTR | TaqMan qPCR   | 34           |
| L1Md_5UTR_R          | GGTCCCGGACCAAGATGG                        | L1 T <sub>FI/II</sub><br>5'UTR | TaqMan qPCR   | 34           |
| L1Md_5UTR<br>probe   | VIC-CGGAGGACAGGTGC-MGBNFQ                 | L1 T <sub>FI/II</sub><br>5'UTR | TaqMan qPCR   | 34           |
| 5S_rRNA_F            | ACGGCCATACCACCTGAA                        | 5S rRNA                        | TaqMan qPCR   | 34           |
| 5S_rRNA_R            | GGTCTCCCATCCAAGTACTAACCA                  | 5S rRNA                        | TaqMan qPCR   | 34           |
| 5S_rRNA_probe        | FAM-CCGAGATCAGACGAGAT-MGBNFQ              | 5S rRNA                        | TaqMan qPCR   | 34           |
| GAPDH_F              | AACTTTGGCATTGTGGAAGG                      | GAPDH                          | SYBR qPCR     | 93           |
| GAPDH_R              | GGATGCAGGGATGATGTTCT                      | GAPDH                          | SYBR qPCR     | 93           |
| PV_F                 | TGTCGATGACAGACGTGCTC                      | PV                             | SYBR qPCR     | 94           |
| PV_R                 | TTCTTCAACCCCAATCTTGC                      | PV                             | SYBR qPCR     | 94           |
| MeCP2_F              | AGGAGAGACTGGAGGAAAAGT                     | MeCP2                          | SYBR qPCR     | 95           |
| MeCP2_R              | CTTAAACTTCAGTGGCTTGTCT                    | MeCP2                          | SYBR qPCR     | 95           |
| L1eGFP_6154          | AATATCACGGGTAGCCAACG                      | EGFP                           | Genotyping    | This study.  |
| L1eGFP_7850          | TAGCGCTACCGACTCAGAT                       | EGFP                           | Genotyping    | This study.  |
| CAPS2.L1_F           | GTCACTCTCCTGCCTGCTC                       | CAPS2.L1                       | RACE/RT-PCR   | This study.  |
| CAPS2.L1_R           | AGTCAACAAGGCTTCCCAGA                      | CAPS2.L1                       | RACE/RT-PCR   | This study.  |
| Dnmt1_F              | CCTAGTCCGTGGCTACGAGGAGAA                  | DNMT1                          | SYBR qPCR     | 46           |
| Dnmt1_R              | TCTCTCCTCTGCAGCCGACTCA                    | DNMT1                          | SYBR qPCR     | 46           |
| Dnmt3a_F             | GCCGAATTGTGTCTTGGTGGATGACA                | DNMT3A                         | SYBR qPCR     | 46           |
| Dnmt3a_R             | CCTGGTGAATGCACTGCAGAAGGA                  | DNMT3A                         | SYBR qPCR     | 46           |

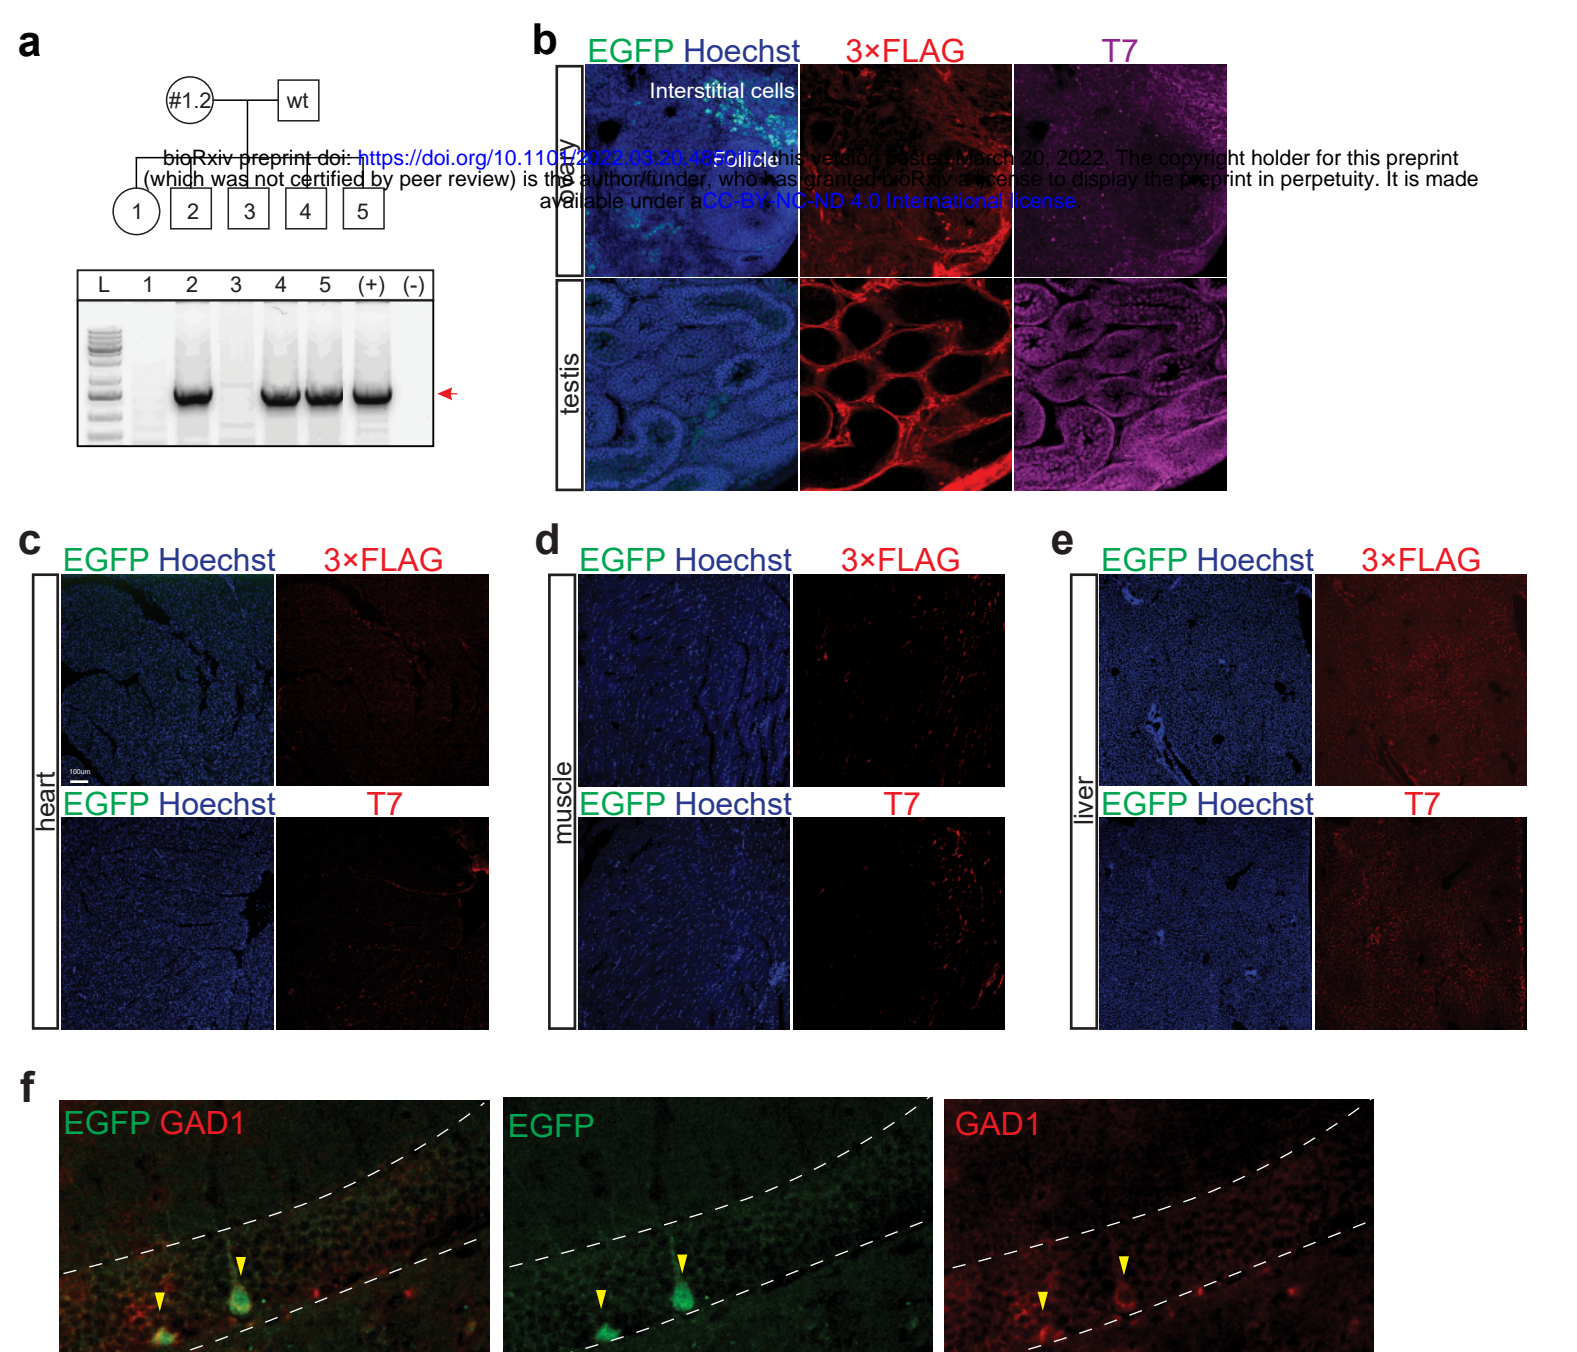

**Extended Data Fig. 1: Assessment of L1 retrotransposition in brain and non-brain tissues of L1-EGFP animals.** **a**, EGFP cassette genotyping PCR results for the offspring of founder animal #1.2. Circles and squares represent female and male mice, respectively. The indicated 1.7kbp PCR product (red arrow) corresponds to the integrated intron-containing EGFP indicator cassette. Gel labels are as follows: L, ladder; 1-5, transgenic offspring littermates; +, EGFP positive control plasmid DNA; -, H<sub>2</sub>O. Offspring 2, 4 and 5 carried the L1-EGFP transgene. **b**, Ovary and testis **c**, heart **d**, muscle and **e**, liver tissues of adult L1-EGFP mice were immunostained for EGFP and L1 proteins (T7-tagged ORF1p and 3×FLAG-tagged ORF2p). EGFP<sup>+</sup> cells were observed in the interstitial cells of the ovaries but not in other tissues. DNA was stained with Hoechst dye (blue). **f**, Representative maximum projection confocal image of a coronal hippocampus section from a transgenic L1-EGFP animal showing immunostaining for EGFP (green) and the interneuron marker GAD1 (red). Yellow arrowheads indicate EGFP<sup>+</sup>/GAD1<sup>+</sup> neurons in DG. The image is presented as merged and single channels for EGFP and GAD1. Scale bar: 100μm.

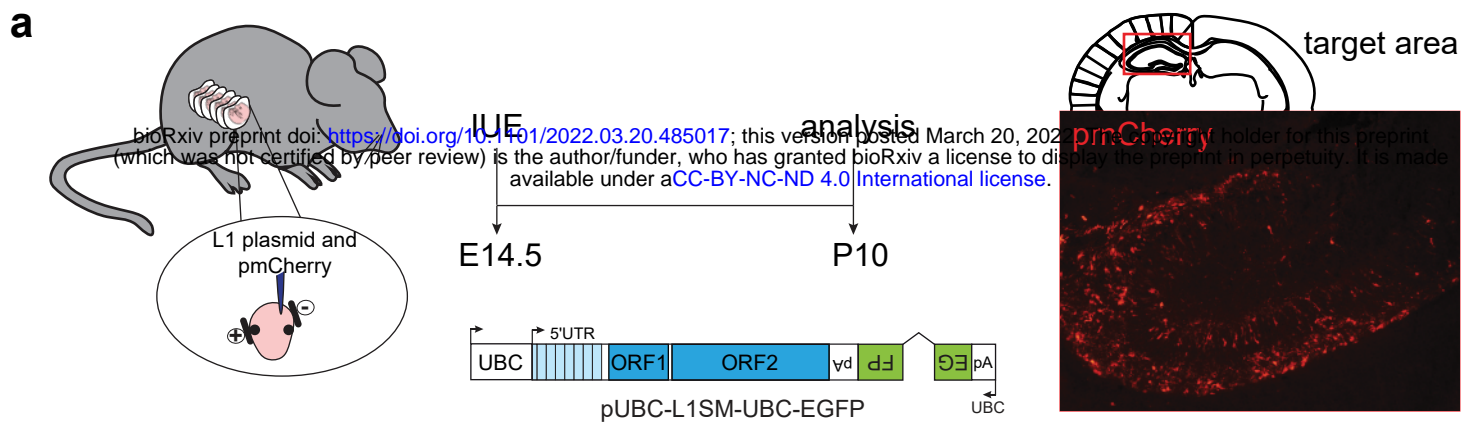

**b** pUBC-L1SM-UBC-EGFP

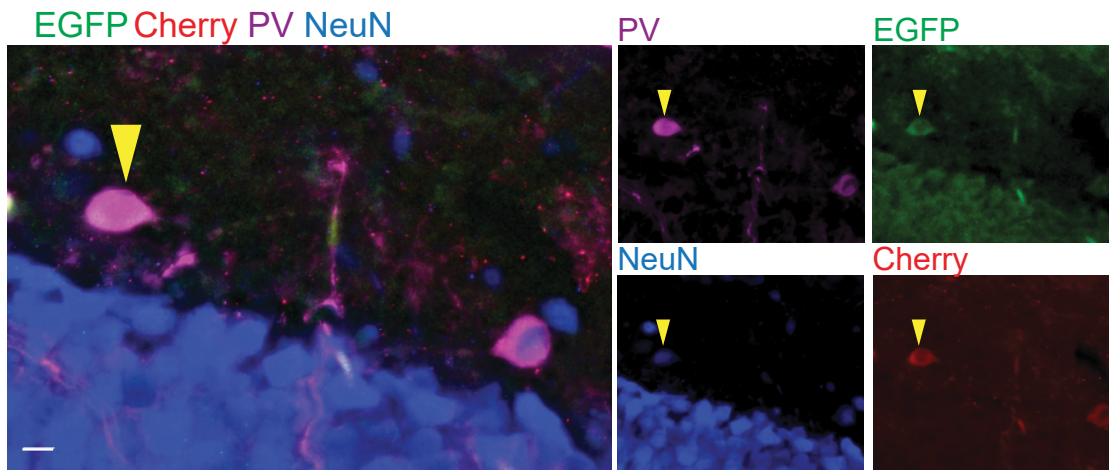

**c** pMut2-UBC-L1SM-UBC-EGFP

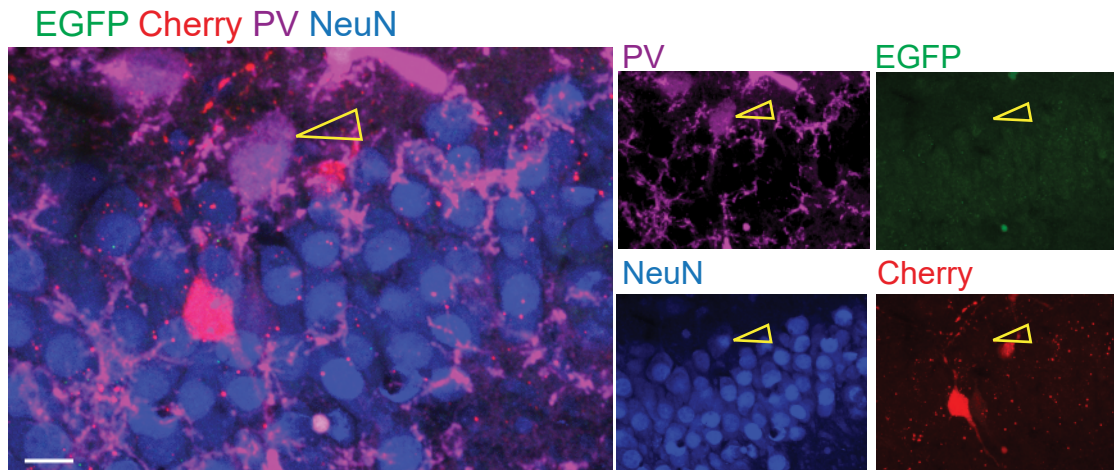

**Extended Data Fig. 2: Retrotransposition of an engineered mouse L1 delivered *in utero*.** **a**, Schematic representation of L1-EGFP reporter *in utero* electroporation (IUE). A coronal view of electrode positioning is shown at left. Embryos were co-injected with pmCherry (where a CMV promoter controls mCherry expression) and a second plasmid, carrying a mouse L1<sup>39</sup> tagged with an EGFP indicator cassette (pUBC-L1SM-UBC-EGFP), into the left hemisphere. As a negative control, embryos were co-injected with pmCherry and a disabled L1 reporter plasmid (pMut2-UBC-L1SM-UBC-EGFP) into the right hemisphere. The red inset, shown at right, displays a coronal section of an electroporated mouse brain with pmCherry visible in the targeted hippocampal region. IUE was performed on embryonic day (E)14.5. Embryos were born and then sacrificed at postnatal day (P)10. Note: UBC-L1SM-UBC-EGFP consists of a heterologous UBC promoter driving expression of a synthetic mouse L1 T<sub>F</sub> (L1SM) containing a native L1 monomeric 5'UTR promoter, codon-optimized ORF1 and ORF2 sequences, the 5' part of the L1 3'UTR, and an intron-interrupted EGFP indicator cassette with its own UBC promoter and polyadenylation signal (pA). In this system, a cell becomes EGFP positive only when the L1-EGFP mRNA is transcribed, spliced, reverse transcribed and integrated into the genome, allowing a functional EGFP to be expressed from its UBC promoter. Mut2-UBC-L1SM-UBC-EGFP is the same as UBC-L1SM-UBC-EGFP, except it carries mutations known to disable ORF2p reverse transcriptase and endonuclease activities<sup>39</sup>. **b**, Example maximum intensity projection confocal image of a hippocampus section from an embryo electroporated with UBC-L1SM-UBC-EGFP. A PV<sup>+</sup> (magenta), Cherry<sup>+</sup> (red), NeuN<sup>+</sup> (blue), EGFP<sup>+</sup> cell is indicated with a yellow arrowhead. **c**, No EGFP<sup>+</sup> cells were found for the retrotransposition-incompetent Mut2-UBC-L1SM-UBC-EGFP plasmid. An empty arrowhead points to a PV<sup>+</sup>, NeuN<sup>+</sup>, Cherry<sup>+</sup>, EGFP<sup>-</sup> cell.

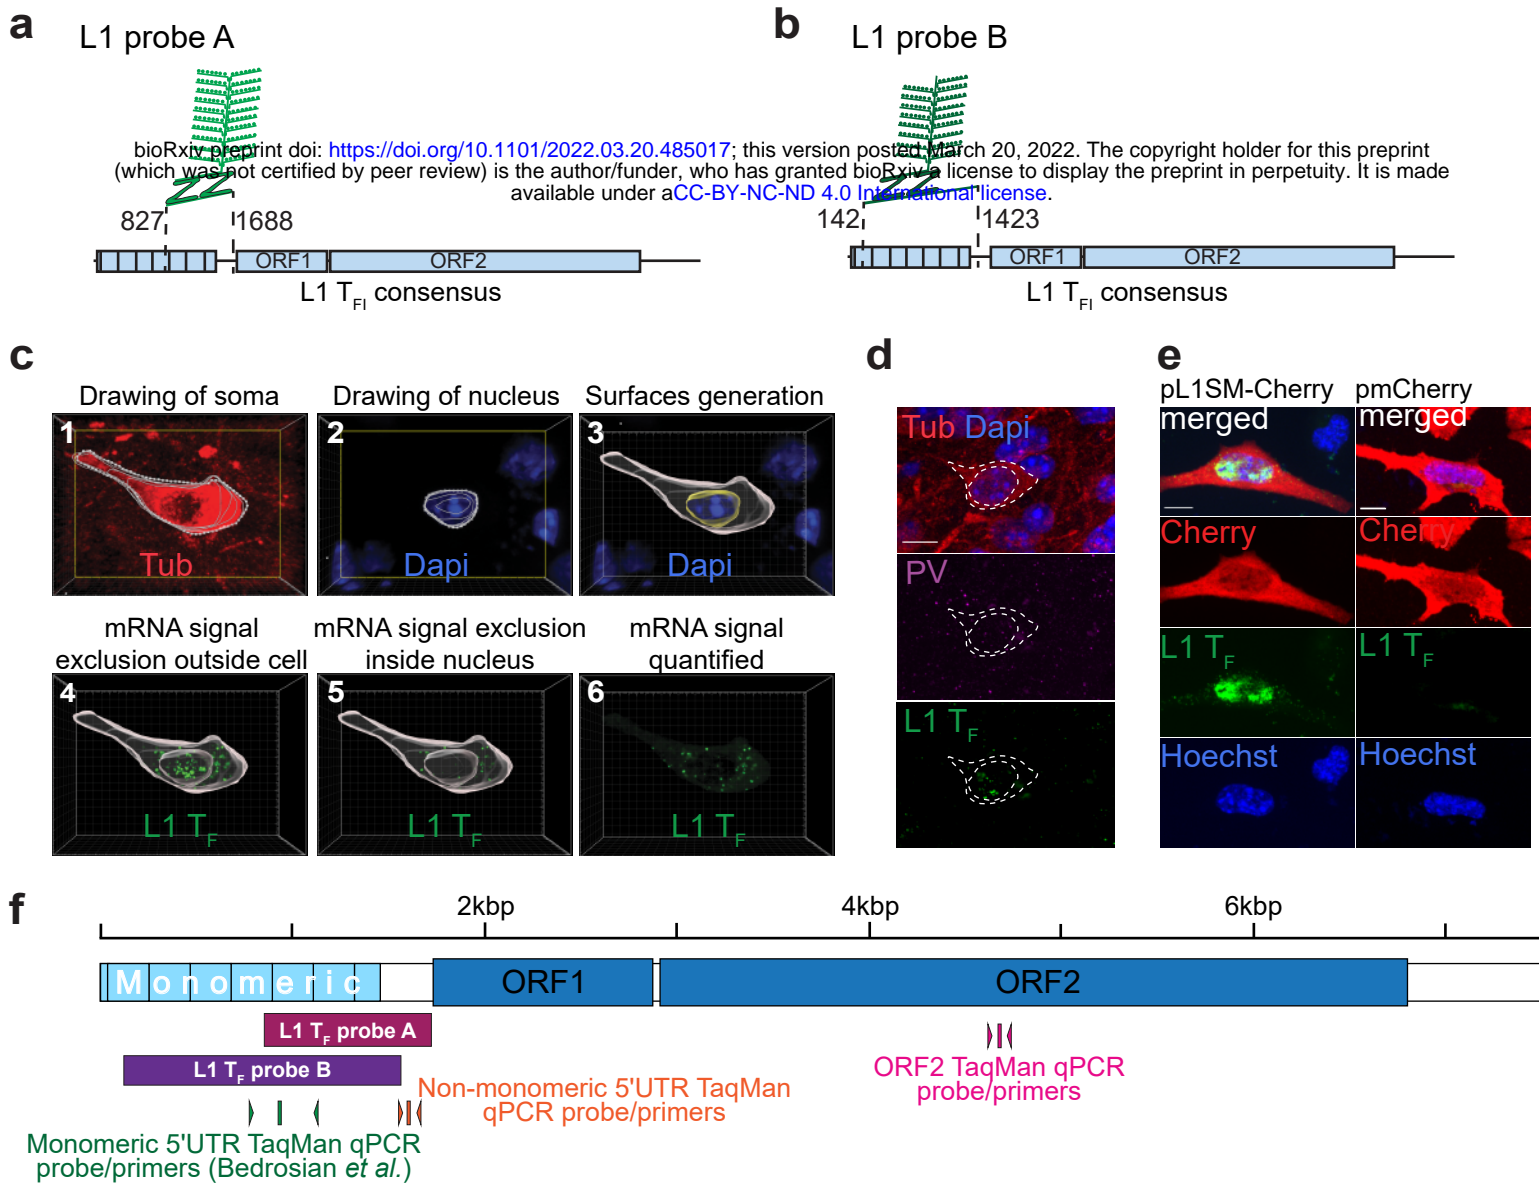

**Extended Data Fig. 3: Single-molecule L1 T<sub>F</sub> RNA FISH experimental design.** **a**, L1 T<sub>F</sub> RNAscope probe A consisted of 20 “ZZ” oligo pairs<sup>92</sup> targeting the L1 T<sub>FI</sub> 5'UTR monomeric and non-monomeric region (consensus positions 827 to 1688). **b**, L1 T<sub>F</sub> probe B was composed of 17 ZZ oligo pairs and targeted the L1 T<sub>FI</sub> 5'UTR monomeric region (positions 142 to 1423). **c**, Imaris analysis performed on Z-stack images of L1 T<sub>F</sub> and PV RNA FISH coronal hippocampus sections immunostained for Tub. Imaris workflow: 1: neuron identification, based on cytoplasmic Tub (red) fluorescence, and cell volume drawing, 2: nucleus definition by DAPI (blue) staining followed by drawing of nuclear volume, 3: delineation of cell and nucleus surfaces, 4: cell surface masking to eliminate voxels outside the cell, 5: nucleus surface masking to exclude voxels inside the nucleus, and 6: L1 T<sub>F</sub> mRNA (green) fluorescence signal within the defined cytoplasmic volume. **d**, Maximum intensity projection confocal image of a hippocampal section showing L1 T<sub>F</sub> probe A (green) and PV (magenta) RNA FISH, and Tub (red) immunohistochemistry, in a selected PV<sup>-</sup> neuron. Dashed lines demark nuclear and cellular boundaries defined for PV and L1 mRNA quantification. **e**, Confocal images of N2A cells transfected with either mouse L1 construct (pL1SM-Cherry) or control (pmCherry) showing specificity of L1 T<sub>F</sub> RNA FISH signal in cells expressing the L1 construct. Scale bar: 10µm. **f**, Schematic showing L1 T<sub>F</sub> sequences assayed by RNA FISH and TaqMan qPCR.

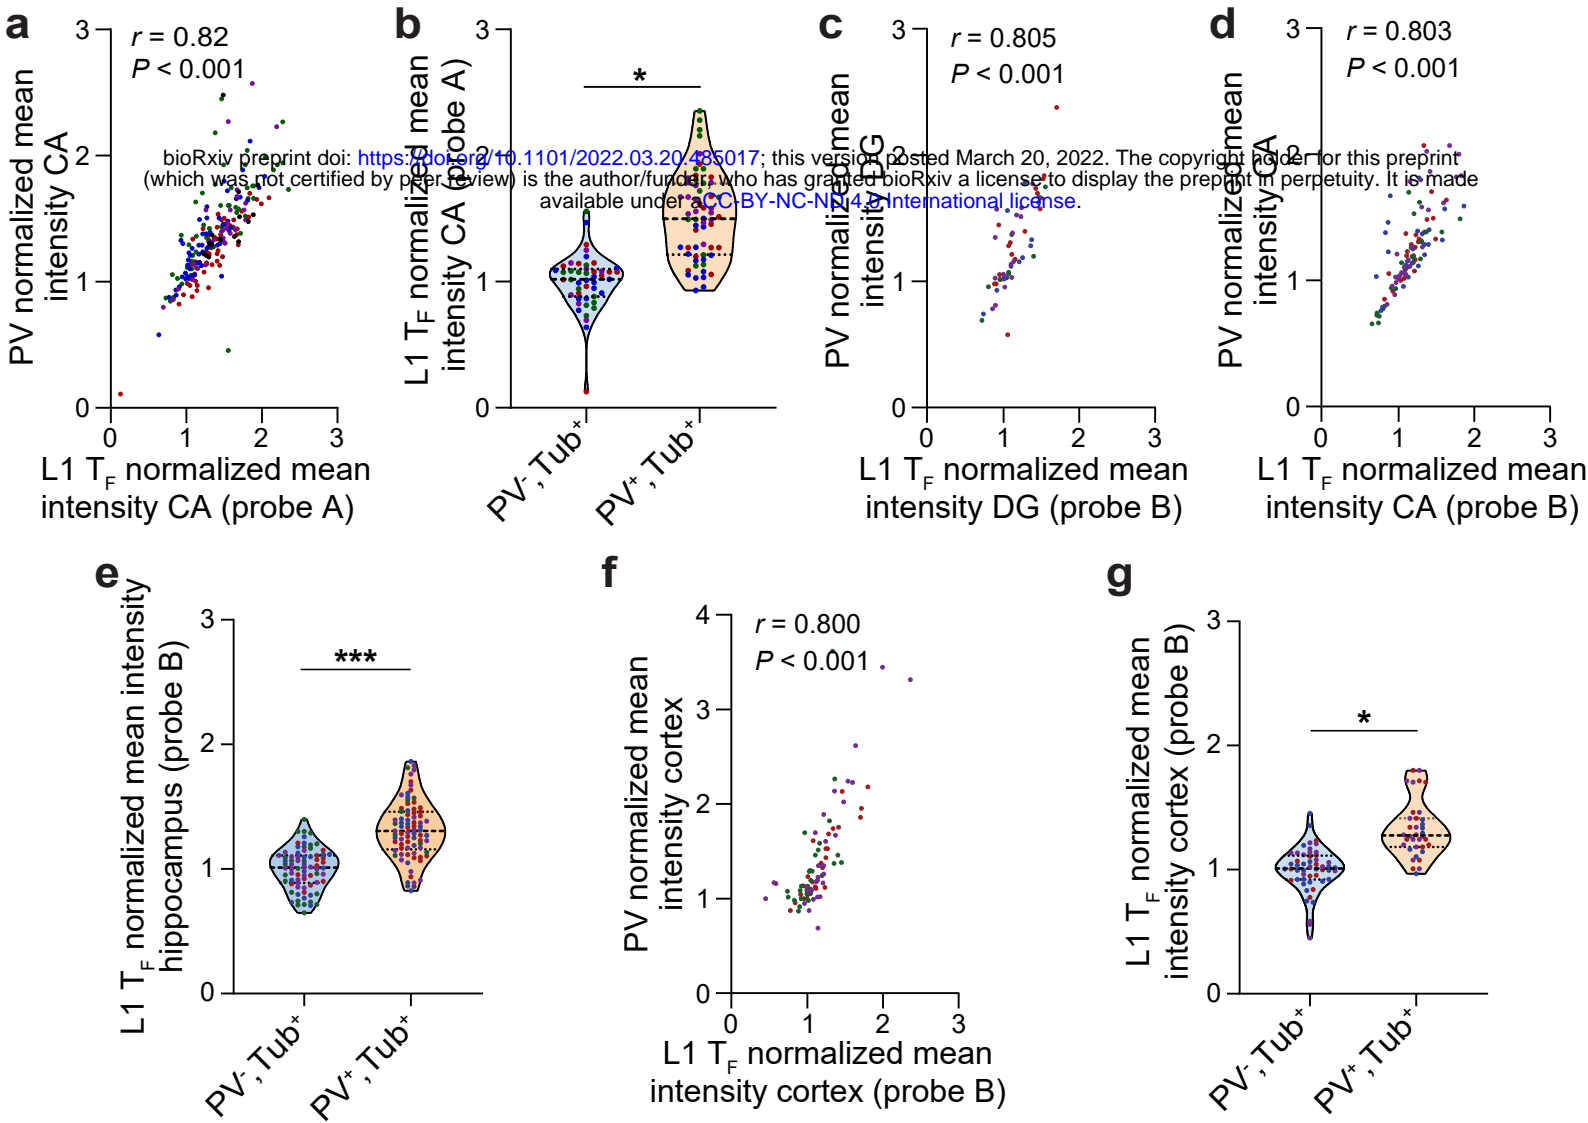

**Extended Data Fig. 4: Additional L1 T<sub>F</sub> RNA FISH data for hippocampus and cortex.** **a**, Mean PV RNA FISH intensity in CA Tub<sup>+</sup> neurons, as a function of L1 T<sub>F</sub> (probe A) signal. Spearman  $r = 0.82$ ,  $P < 0.001$  at  $\alpha = 0.05$ ,  $n(\text{cells}) = 210$ ,  $N(\text{mice}) = 4$ . Cells from different mice are color coded. **b**, Mean L1 T<sub>F</sub> RNA FISH (probe A) intensity in CA PV<sup>-</sup>/Tub<sup>+</sup> (blue plot) and PV<sup>+</sup>/Tub<sup>+</sup> neurons (orange plot). \* $P = 0.0251$ , two-tailed t test comparing animal means, PV<sup>-</sup>/Tub<sup>+</sup>  $n = 47$ , PV<sup>+</sup>/Tub<sup>+</sup>  $n = 60$ . **c**, Mean RNA FISH intensity of L1 T<sub>F</sub> probe B and PV in DG Tub<sup>+</sup> neurons.  $n = 55$ ,  $N = 4$ . **d**, As per (c), except showing results for CA.  $n = 102$ ,  $N = 4$ . **e**, Mean L1 T<sub>F</sub> RNA FISH (probe B) intensity in hippocampal PV<sup>-</sup>/Tub<sup>+</sup> neurons and PV<sup>+</sup>/Tub<sup>+</sup> neurons. \*\*\* $P = 0.0008$ , PV<sup>-</sup>/Tub<sup>+</sup>  $n = 76$ , PV<sup>+</sup>/Tub<sup>+</sup>  $n = 81$ ,  $N = 4$ . **f**, As per (c), except for cortex.  $n = 87$ ,  $N = 4$ . **g**, As per (e), except for cortex. \* $P = 0.0193$ , PV<sup>-</sup>/Tub<sup>+</sup>  $n = 52$ , PV<sup>+</sup>/Tub<sup>+</sup>  $n = 36$ ,  $N = 4$ . Note: PV<sup>+</sup>/Tub<sup>+</sup> values were normalized to PV<sup>-</sup>/Tub<sup>+</sup> mean values.

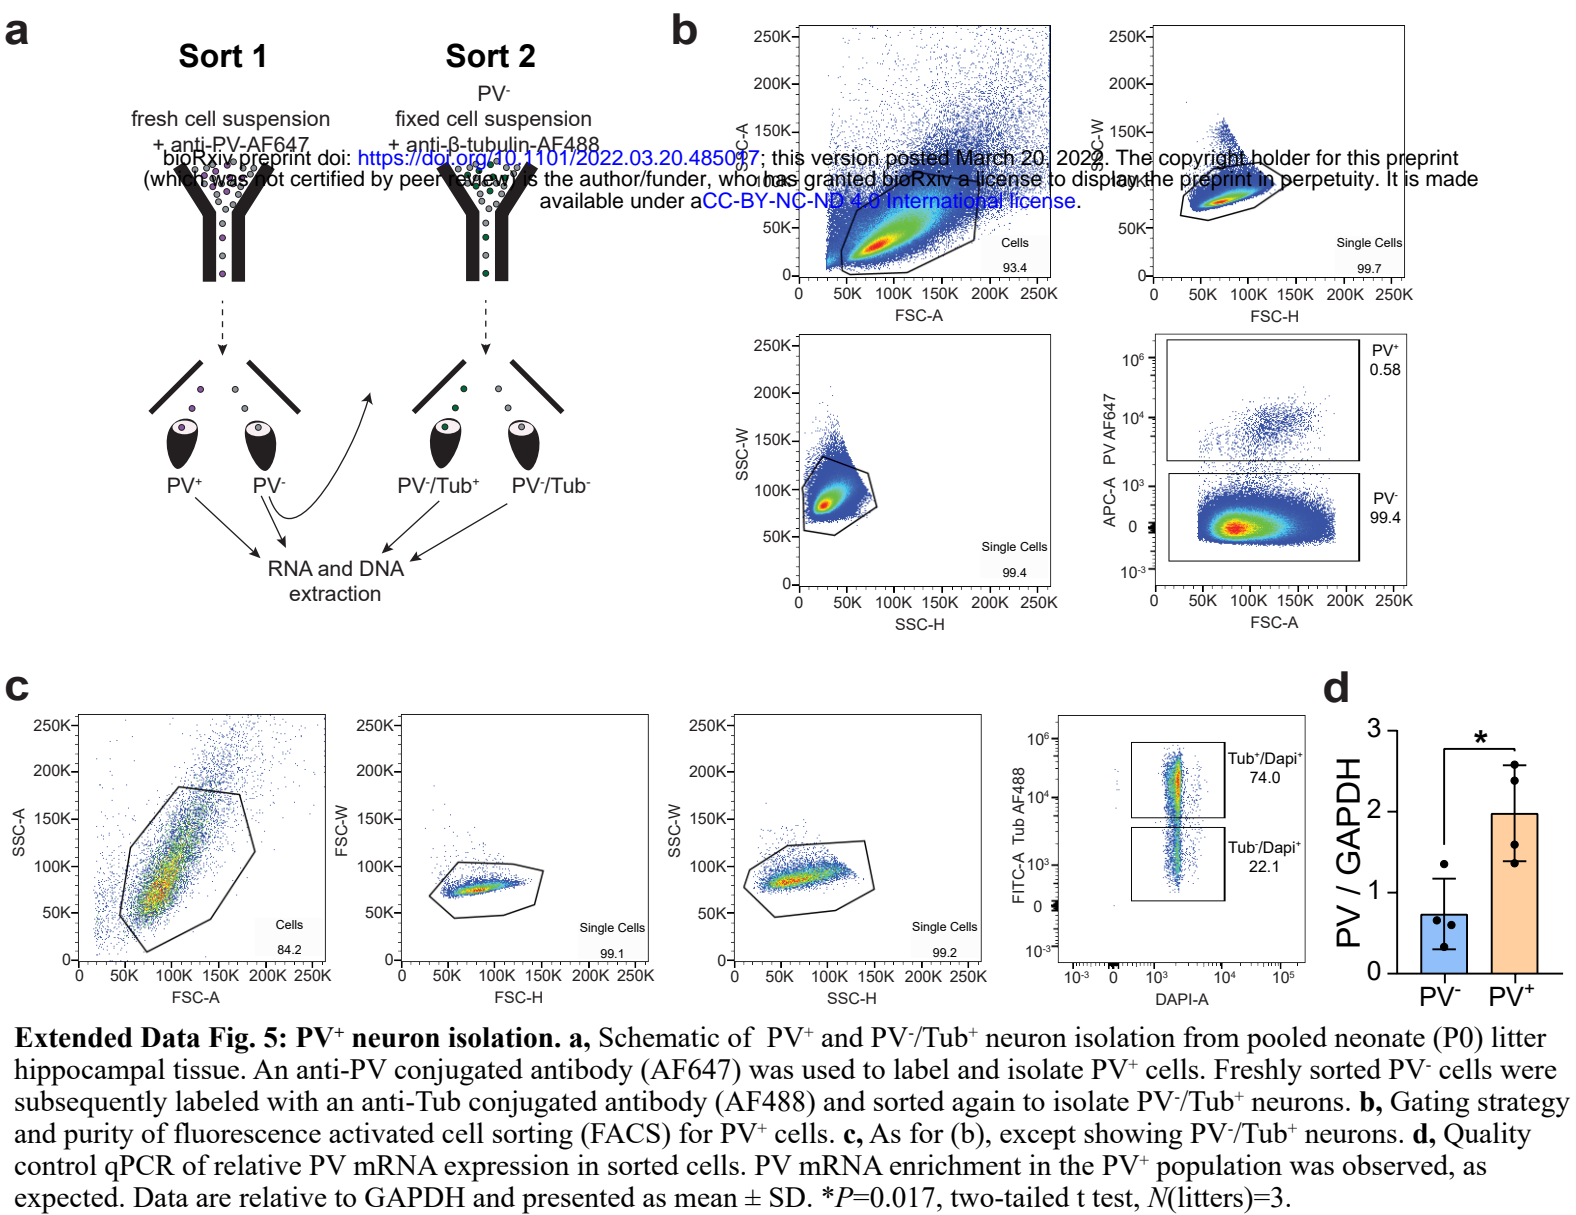

**Extended Data Fig. 5: PV<sup>+</sup> neuron isolation.** **a**, Schematic of PV<sup>+</sup> and PV<sup>-</sup>/Tub<sup>+</sup> neuron isolation from pooled neonate (P0) litter hippocampal tissue. An anti-PV conjugated antibody (AF647) was used to label and isolate PV<sup>+</sup> cells. Freshly sorted PV<sup>-</sup> cells were subsequently labeled with an anti-Tub conjugated antibody (AF488) and sorted again to isolate PV<sup>-</sup>/Tub<sup>+</sup> neurons. **b**, Gating strategy and purity of fluorescence activated cell sorting (FACS) for PV<sup>-</sup> cells. **c**, As for (b), except showing PV<sup>-</sup>/Tub<sup>+</sup> neurons. **d**, Quality control qPCR of relative PV mRNA expression in sorted cells. PV mRNA enrichment in the PV<sup>+</sup> population was observed, as expected. Data are relative to GAPDH and presented as mean  $\pm$  SD. \* $P=0.017$ , two-tailed t test,  $N(\text{litters})=3$ .

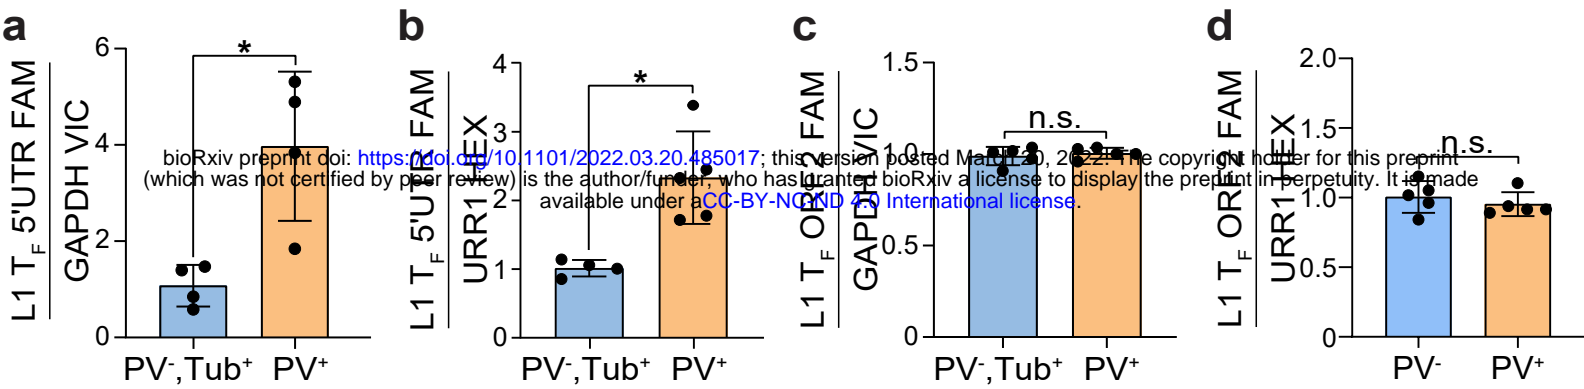

**Extended Data Fig. 6: Elevated L1 transcription in PV<sup>+</sup> neurons.** **a**, Multiplexed TaqMan qPCR measuring mRNA abundance of the L1 T<sub>F</sub> non-monomeric 5'UTR sequence (FAM channel) relative to GAPDH (VIC channel) in sorted PV<sup>-</sup>/Tub<sup>+</sup> and PV<sup>+</sup> neurons. Cells were sorted from pooled neonate (P0) litter hippocampi. \* $P=0.029$ ,  $N=4$  litters. **b**, As for (a), except relative to URR1 repetitive DNA (HEX channel). \*\* $P=0.011$ ,  $N=4-5$  litters. **c**, As for (a), except measuring L1 T<sub>F</sub> ORF2 (FAM channel) relative to GAPDH (VIC channel).  $P=0.582$ ,  $N=5$  litters. **d**, As for (a), except for L1 T<sub>F</sub> ORF2 (FAM channel) relative to URR1 repetitive DNA (HEX channel) in PV<sup>-</sup> cells and PV<sup>+</sup> neurons.  $P=0.444$ ,  $N=5$  litters. Note: Data are represented as mean  $\pm$  SD with significance values determined via two tailed t tests.

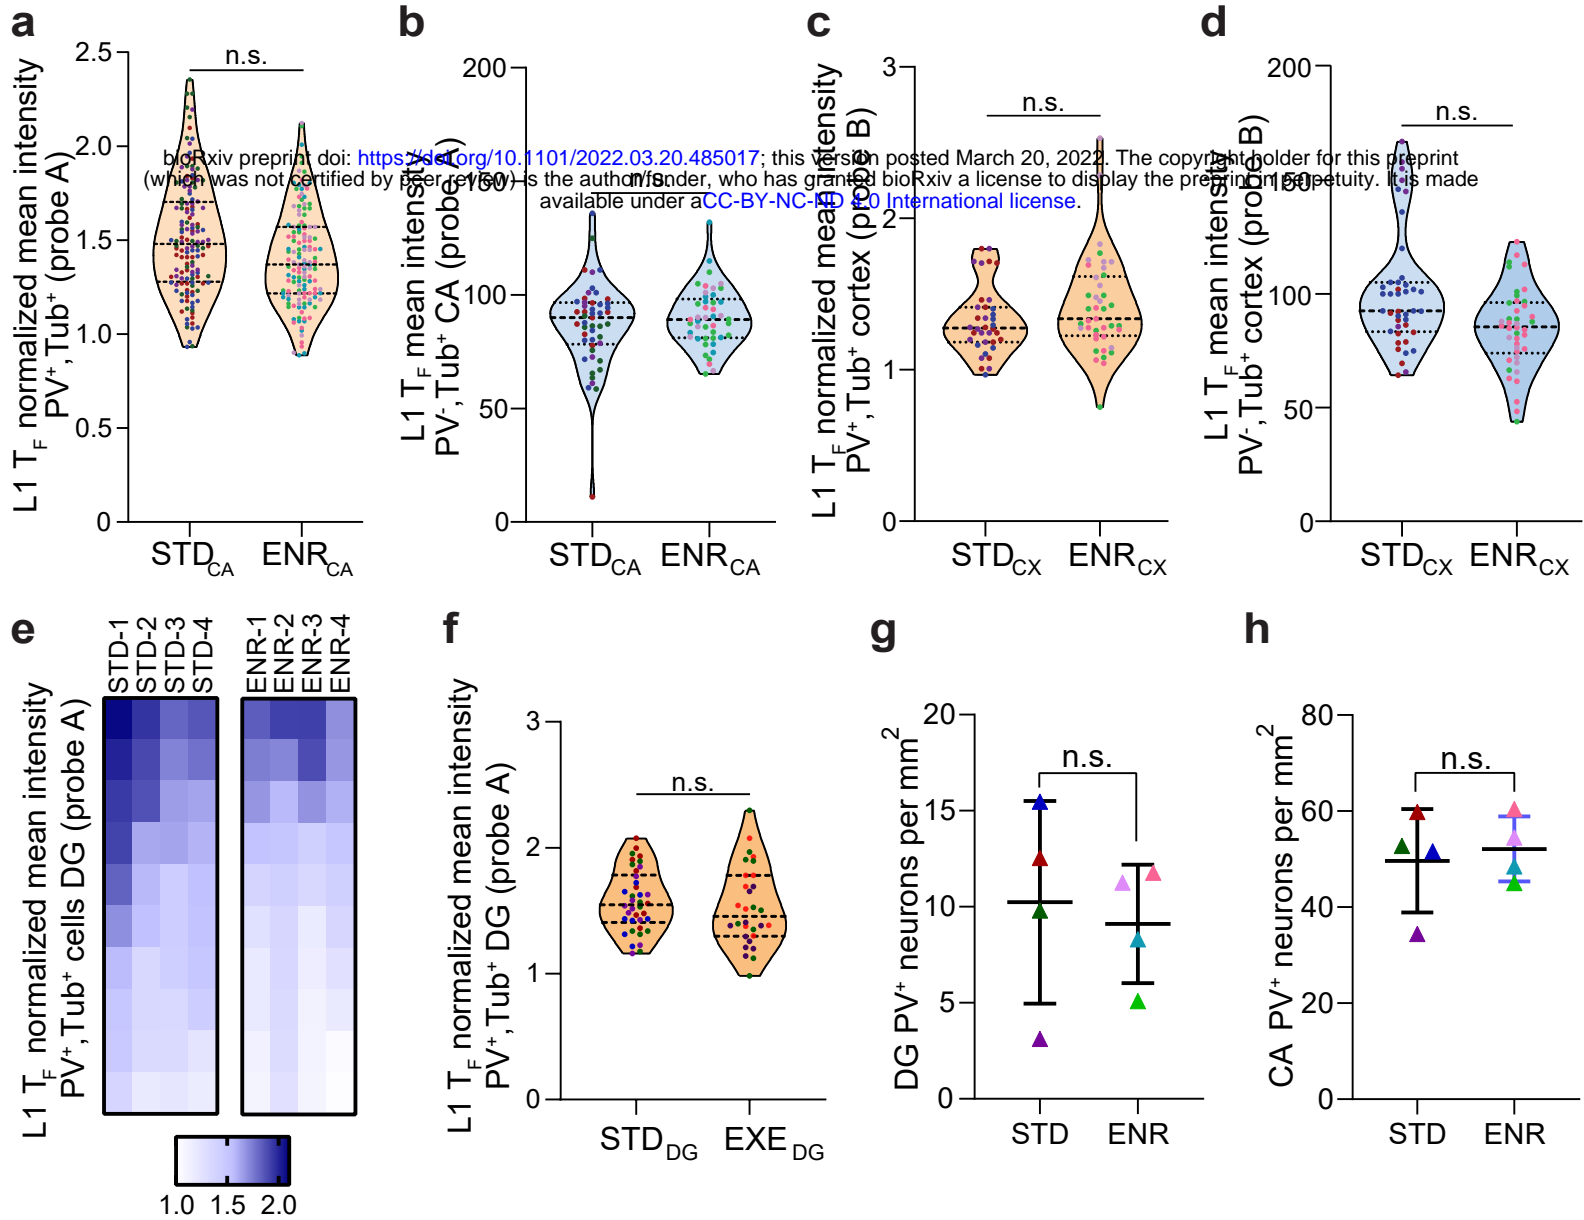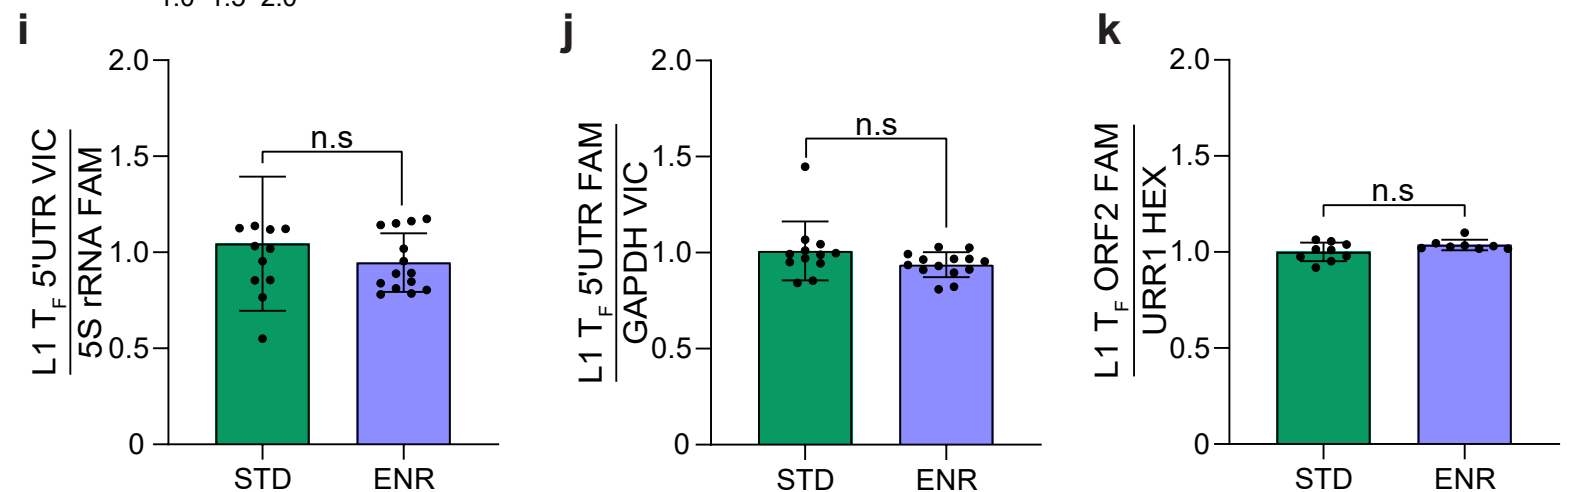

**Extended Data Fig. 7: Environmental enrichment does not impact PV<sup>+</sup> neuron count, or L1 mRNA abundance in PV<sup>+</sup> neurons.** **a**, Mean L1 T<sub>F</sub> RNA FISH (probe A) intensity in PV<sup>+</sup>/Tub<sup>+</sup> neurons from STD and ENR animal CA tissue.  $P=0.189$ , STD  $n(\text{cells})=140$ , ENR  $n=138$ ,  $N(\text{mice})=4$ . Values were normalized to PV<sup>-</sup>/Tub<sup>+</sup> mean values. Cells from each mouse are color coded. **b**, Mean L1 T<sub>F</sub> RNA FISH intensity (probe A) in PV<sup>+</sup>/Tub<sup>+</sup> CA neurons.  $P=0.294$ , STD  $n=49$ , ENR  $n=45$ ,  $N=4$ . **c**, As per (a), except showing cortex data obtained with L1 T<sub>F</sub> probe B.  $P=0.648$ , STD  $n=36$ , ENR  $n=41$ ,  $N=3$ . **d**, As for (b), except displaying cortex data obtained with L1 T<sub>F</sub> probe B.  $P=0.276$ , STD  $n=42$ , ENR  $n=42$ . **e**, Heatmaps comparing normalized mean L1 T<sub>F</sub> RNA FISH intensity (probe A) in DG neurons from STD and ENR mice. Each column represents an individual animal, while each cell represents a neuron and is colored based on L1 T<sub>F</sub> mRNA abundance relative to the median value of the STD group.  $n=10$ ,  $N=4$ . **f**, Mean L1 T<sub>F</sub> RNA FISH intensity (probe A) in PV<sup>+</sup>/Tub<sup>+</sup> neurons of DG from mice housed in STD conditions or with access to exercise (EXE).  $P=0.71$ , STD  $n=38$ , EXE  $n=30$ ,  $N=4$ . **g**, Stereological estimation of PV<sup>+</sup> neuron number in DG of STD and ENR mice.  $P=0.726$ ,  $N=4$ . **h**, As for (g), except displaying CA data.  $P=0.714$ ,  $N=4$ . **i**, TaqMan qPCR measuring abundance of the L1 T<sub>F</sub> mRNA monomeric 5'UTR (VIC channel) relative to 5S rRNA (FAM channel) in bulk hippocampus samples from STD and ENR mice.  $P=0.38$ , STD  $N=12$ , ENR  $N=14$ . **j**, As for (i), except targeting the L1 T<sub>F</sub> non-monomeric 5'UTR (FAM channel) relative to GAPDH (VIC channel).  $P=0.15$ . **k**, As for (i), except measuring L1 T<sub>F</sub> ORF2 (FAM channel) relative to URR1 (HEX channel).  $P=0.07$ , STD  $N=9$ , ENR  $N=8$ . Note: values in (g-k) are represented as mean  $\pm$  SD. Significance values for all but (e) were obtained via two-tailed t test comparing means of animals or groups, where appropriate.



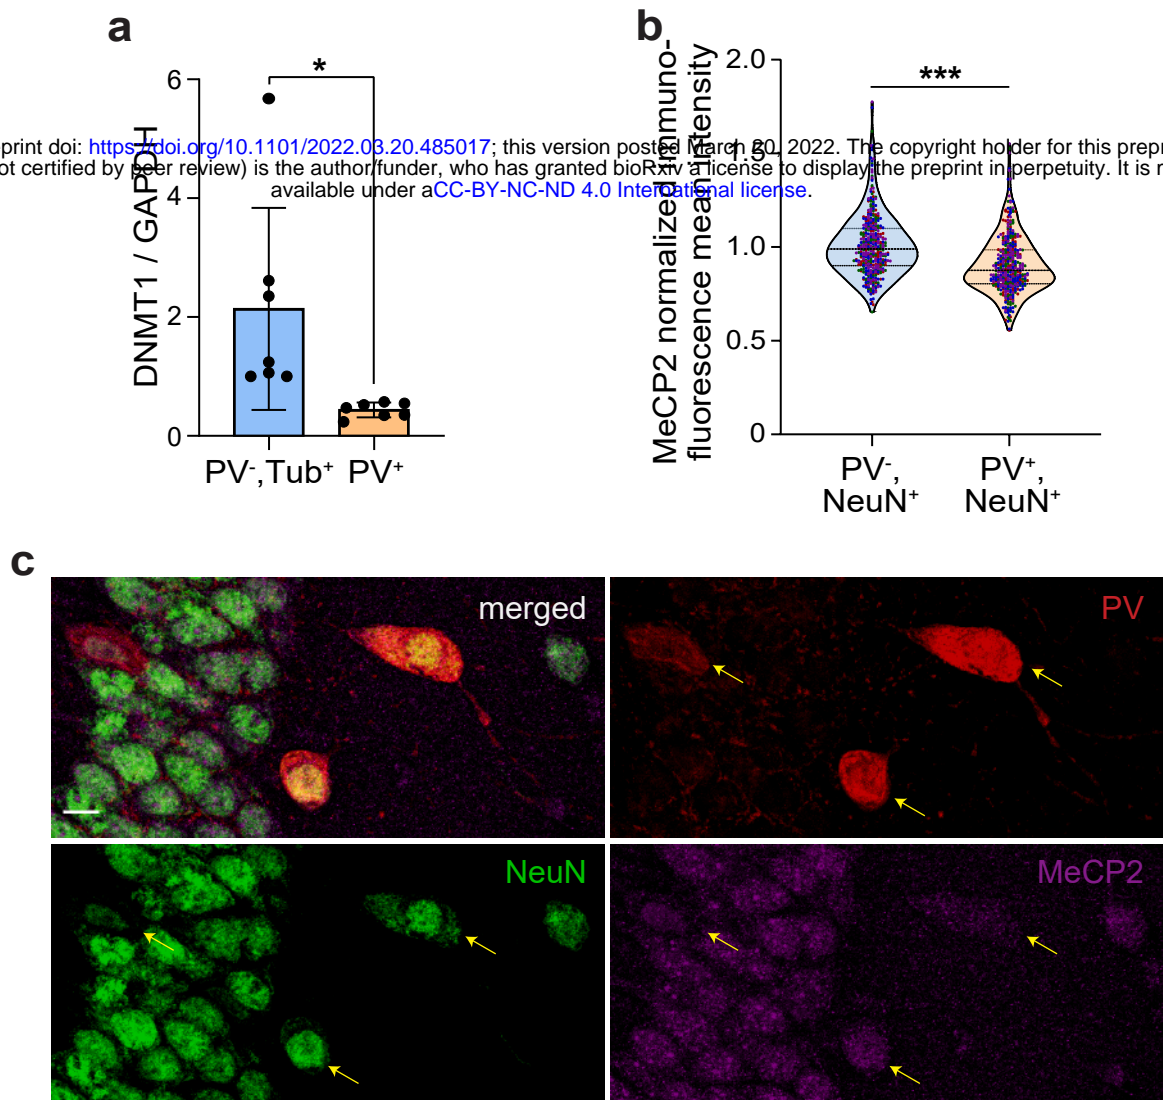

**Extended Data Fig. 8: Relaxation of epigenetic repression in PV<sup>+</sup> neurons.** **a**, DNMT1 mRNA abundance measured by qPCR in PV<sup>-</sup>/Tub<sup>+</sup> and PV<sup>+</sup> neurons, relative to GAPDH. \* $P=0.038$ , two-tailed t test,  $N=7$  litters. **b**, MeCP2 protein expression in PV<sup>-</sup>/NeuN<sup>+</sup> (blue plot) and PV<sup>+</sup>/NeuN<sup>+</sup> (orange plot) neurons. MeCP2 immunofluorescence mean intensities were obtained from coronal hippocampus sections stained for MeCP2, PV and NeuN, and normalized to the PV<sup>-</sup>/NeuN<sup>+</sup> population mean. \*\*\* $P=0.0007$ , PV<sup>-</sup>/NeuN<sup>+</sup>  $n(\text{cells})=414$ , PV<sup>+</sup>/NeuN<sup>+</sup>  $n=414$ ,  $N(\text{mice})=4$ . Cells from each mouse are color coded. **c**, Representative immunostaining image of a coronal hippocampus section showing colocalization of MeCP2 (magenta) with PV (red) and the pan-neuronal marker NeuN (green). Yellow arrows indicate PV<sup>+</sup> neurons on single channel images. Scale bar: 10 $\mu\text{m}$ .

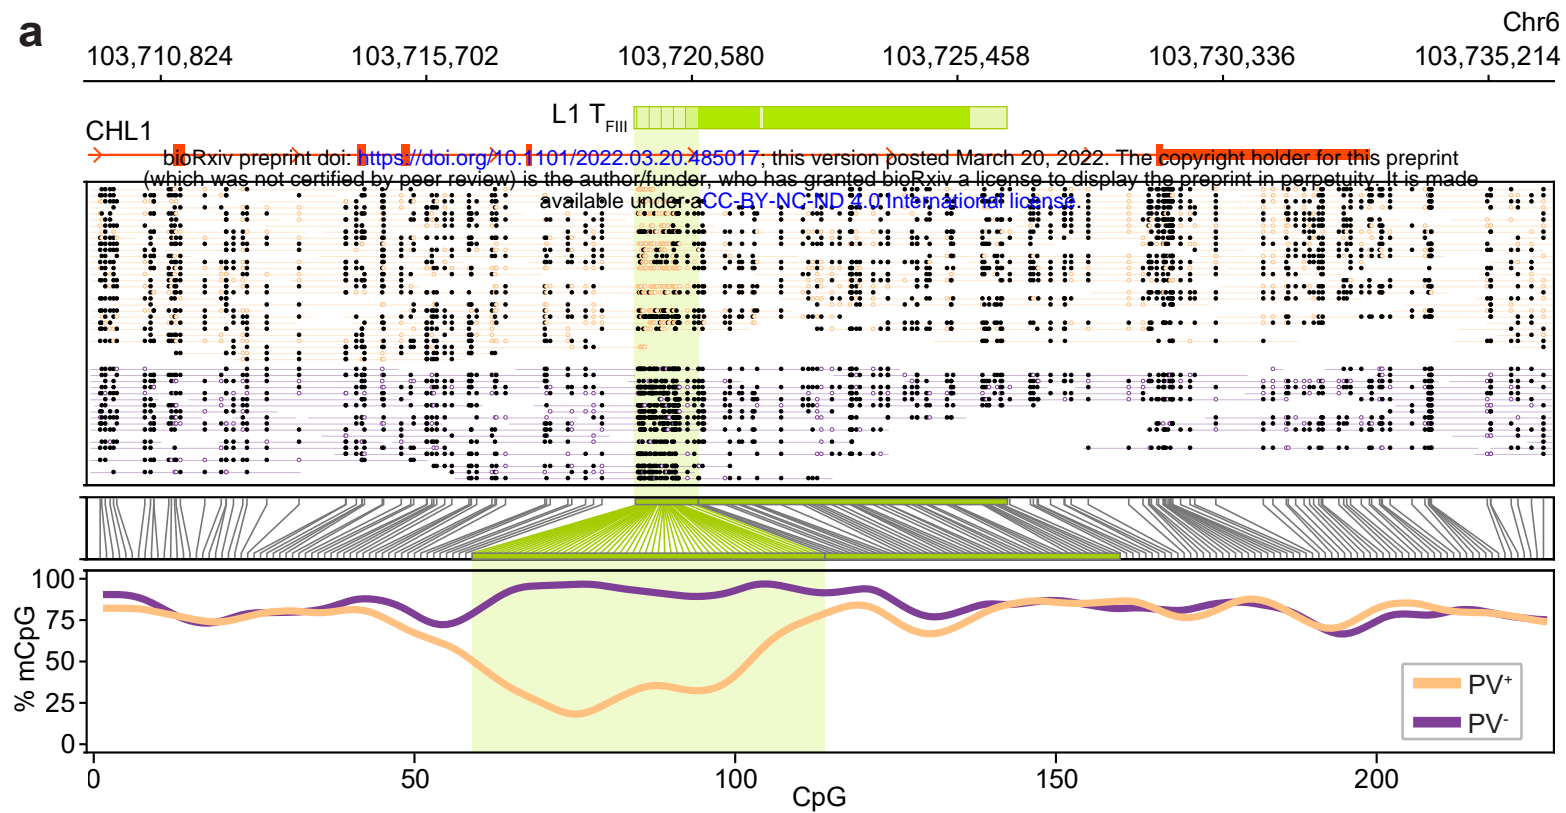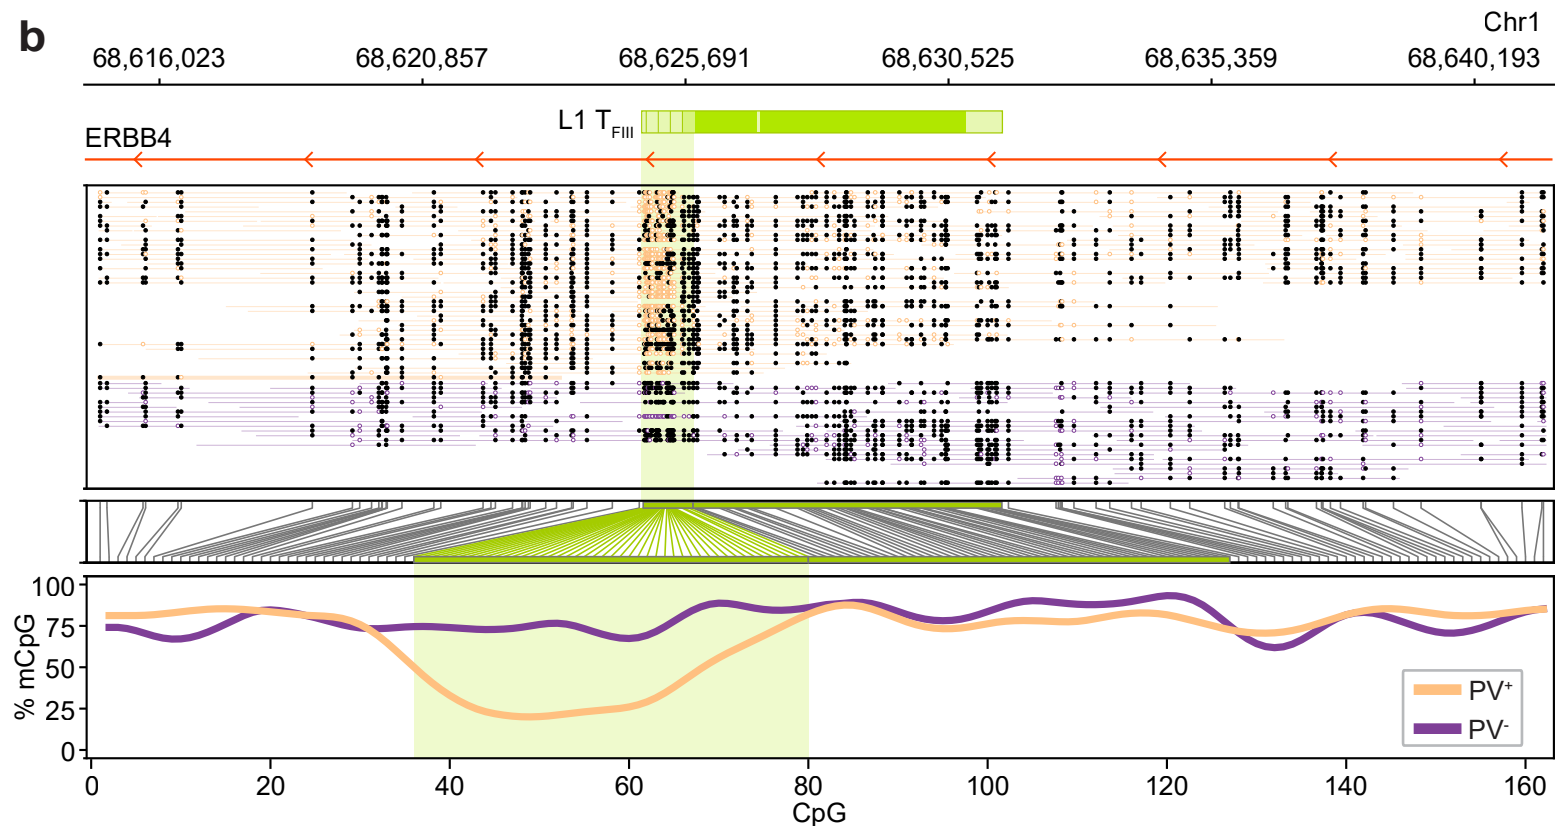

**Extended Data Fig. 9: Demethylated L1s in PV<sup>+</sup> neuron genes, as identified by ONT sequencing.** **a**, Methylation profile of a full-length L1 T<sub>FIII</sub> element with intact ORFs, intronic to CHL1. The first panel shows the L1 orientated in sense to the last intron of CHL1. The second panel displays aligned ONT reads, with unmethylated CpGs colored in orange (PV<sup>+</sup>) and purple (PV<sup>-</sup>), and methylated CpGs colored black. The third panel indicates the relationship between CpG positions in genome space and CpG space, including those corresponding to the L1 T<sub>FIII</sub> 5'UTR (shaded light green). The fourth panel indicates the fraction of methylated CpGs for each cell type across CpG space. **b**, As for (a), except displaying an L1 T<sub>FIII</sub> antisense and intronic to ERBB4.

# Parvalbumin (PV<sup>+</sup>) interneurons

bioRxiv preprint doi: <https://doi.org/10.1101/2022.03.20.485017>; this version posted March 20, 2022. The copyright holder for this preprint (which was not certified by peer review) is the author/funder, who has granted bioRxiv a license to display the preprint in perpetuity. It is made available under aCC-BY-NC-ND 4.0 International license.

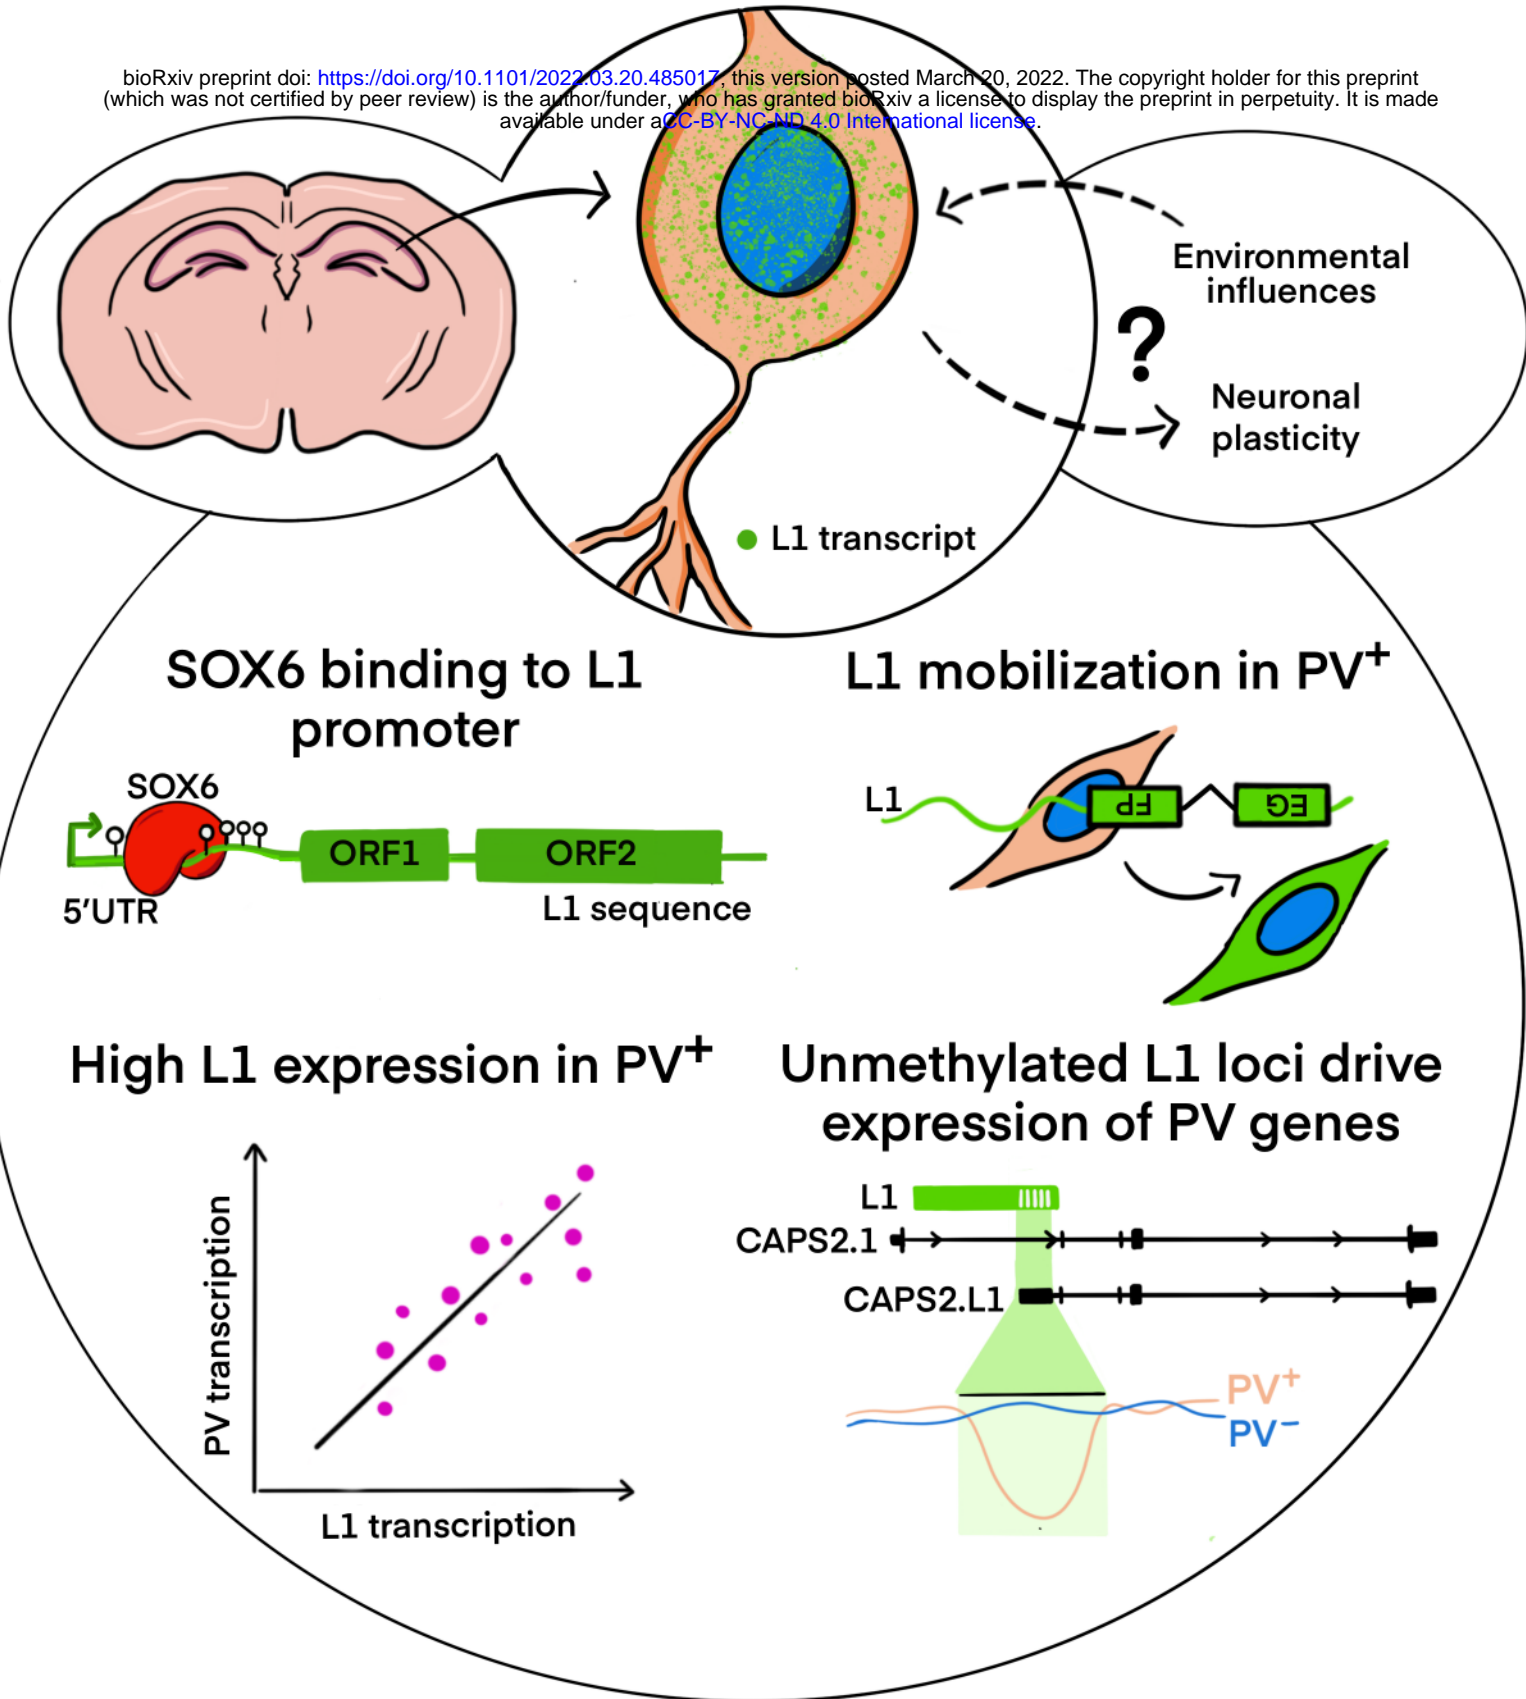

Extended Data Fig. 10: Model of L1 activation in PV<sup>+</sup> neurons by SOX6.
